1 Seed encrusting with salicylic acid: a novel approach to  
2 improve establishment of grass species in ecological  
3 restoration  
4

5 Simone Pedrini<sup>1\*</sup>, Jason C. Stevens<sup>2,3</sup>, Adam Cross<sup>4,5</sup> and Kingsley W. Dixon<sup>1,3</sup>

6

7 <sup>1</sup> ARC Centre for Mine Site Restoration, School of molecular and life science, Curtin University, Kent Street,  
8 Bentley, 6102, Western Australia

9 <sup>2</sup> Kings Park Science, Department of Biodiversity, Conservation and Attractions, 2 Kattidj Close, Kings Park,  
10 6005, Western Australia

11 <sup>3</sup> School of Biological Sciences, The University of Western Australia, 35 Stirling Highway, Crawley WA 6009,  
12 Western Australia.

13 <sup>4</sup> EcoHealth Network, 1330 Beacon St, Suite 355a, Brookline, MA 02446, United States.

14 <sup>5</sup> School of Molecular and Life Sciences, Curtin University, Kent Street, Bentley, WA 6102, Australia.

15 \* Corresponding author: [simone.pedrini@curtin.edu.au](mailto:simone.pedrini@curtin.edu.au)

16

17 Keywords: seed coating, seed enhancement, germination, emergence, grassland, demographic  
18 process

19

20

21

22

23

## 24 Abstract

25 To achieve global ambitions in large scale ecological restoration, there is a need for approaches that  
26 improve the efficiency of seed-based restoration, particularly in overcoming the bottleneck in the  
27 transition from germination to seedling establishment. In this study we tested a novel seed-based  
28 application of the plant stress modulator compound, salicylic acid, as a means to reduce seedling  
29 losses in seed-to-seedling phase. First-time seed coating technology (encrusting) was developed as a  
30 precursor for optimising field sowing for three grass species commonly used in restoration  
31 programs, *Aurolstipa scabra*, *Microlaena stipoides*, and *Rytidosperma geniculata*. Salicylic acid (SA,  
32 0.1mM) was delivered to seeds via imbibition and seed encrusting with the effects tested on seed  
33 germination under controlled conditions (to test for resilience to drought), and in field conditions on  
34 seedling emergence, plant survival, and seedling growth. SA did not significantly impact germination  
35 under water stress in controlled laboratory condition and did not affect seedling emergence in the  
36 field. However, seedling survival and growth was improved in plants from SA treated seeds (imbibed  
37 and encrusted) under field conditions. When SA delivery mechanisms of imbibing and coating were  
38 compared, there was no significant difference in survival and growth, showing that seed coating has  
39 potential to deliver SA. Effect of intraspecific competition as a result of seedling density was also  
40 considered. Seedling survival over the dry summer season more than doubled when seed was sown  
41 at low density (40 plants/m<sup>2</sup>) compared to high density seeding (380 plants/m<sup>2</sup>). Overall, adjustment  
42 of seeding rate according to expected emergence combined with the use of salicylic acid is a cost-  
43 effective means for improving seed use efficiency in seed-based restoration.

44

45

46

## 47 Introduction

48 Almost two-thirds of the world ecosystems are considered degraded or damaged with a lack of  
49 restorative effectiveness often unable to compensate for ecosystem loss [1]. Such degradation poses  
50 a serious risk to biodiversity, and impacts human communities that rely on ecosystem services for  
51 their sustenance and wellbeing [2,3]. Once degradation has occurred, restorative activities can be  
52 used to return the functionality, diversity, and structure of healthy, intact, and sustainable  
53 ecosystems [4,5]. Grasslands are among the most extensive terrestrial ecosystems in the world,  
54 covering over 52.5 million km<sup>2</sup> [6], and provide fundamental ecosystem services such as sustaining  
55 food production (e.g., through rangeland pastoralism and dairy), carbon sequestration and storage,  
56 and erosion control [7]. However, almost half of the global grassland estate is considered degraded  
57 due to human activities and climate change [8] with important flow-on impacts for human societies  
58 whose livelihoods depend upon these grasslands.

59 In cases like of extreme disturbance, like post mining landscape, where spontaneous regeneration  
60 may not be feasible or effective, restorative interventions are required [9]. Native seeds of  
61 appropriate-local origin are commonly used to reintroduce missing species and to perform ecological  
62 restoration when the land has limited natural regenerative capacity [10,11]. However, abiotic factors  
63 such as nutrient-impoverishment, chemical and physically-hostile soil conditions [12] and low or  
64 unpredictable water availability [13], combined with biotic variables such as seed predation [14] and  
65 competition with exotic species, combine to limit the success of traditional seed-based grassland  
66 restoration.

67 Generally, less than 10% of sown native seeds become established plants, with significant  
68 bottlenecks detected at the seedling emergence phase [15], and in survival through the first summer  
69 drought [16]. Given the high cost and often highly limited availability of native seed [17], improving  
70 the efficiency in deployment to site is crucial if ecological restoration is to be delivered at the  
71 landscape scales expected [18] such as the UN Decade of Ecosystem Restoration. To address issues

72 related to logistical constraints on seed delivery, and seedling establishment, the crop seed industry  
73 has developed technologies, such as seed coating, that could be adapted and applied to native seed  
74 [19].

75 Seed coating is the practice of covering seeds with external materials, sometimes including active  
76 ingredients conferring seeds protection and improved physiological performance [20]. Seed coating  
77 has been tested on native seeds in different restoration scenarios to overcome specific limitations  
78 such as water repellency [21], soil crusting [22], and seed predation [23]. However, despite  
79 promising results in seed coating improving seedling emergence, limited studies have so far  
80 attempted to improve native seed germination and seedling resistance to abiotic stresses [24].

81 Resistance to some abiotic stresses could be conferred by exposure of seeds to salicylic acid (SA). SA  
82 is a plant hormone, synthesised by many plant species [25]. It is involved in plant growth,  
83 developmental regulation [26], signalling [27], thermogenesis and mediating stress response either  
84 by providing resistance or triggering apoptosis [28]. Exogenous application of SA through watering,  
85 foliar spray, or seed imbibition has shown increased plant resistance and survival to a wide range of  
86 abiotic and biotic stresses [29]. SA efficacy in conferring stress resistance is a function of its  
87 concentration, with low concentrations failing to deliver resistance and higher concentrations  
88 decreasing resistance by activating cell death pathways [30,31]. The effect of SA on seed  
89 germination remains unclear; studies using seeds of crop species report improved germination for  
90 *Arabidopsis thaliana* under salinity stress [32] and for wheat (*Triticum aestivum*) under drought  
91 stress [33], while no effect was reported for maize (*Zea mays*) [34] or barley (*Hordeum vulgare*) [35].  
92 Seed coating delivery of SA has shown some promising results when tested on tobacco seeds,  
93 improving germination and seedling growth under drought stress [36], and on corn, inducing  
94 resistance to chilling [37]. However, it has never been tested on native species for ecological  
95 restoration.

96 The goal of this study is to evaluate the effects of SA applied to seed on germination success,  
97 seedling emergence, survival and growth on three grass species native to southern temperate  
98 Australia, and to compare SA delivery methods via imbibition and coating.

99 The following hypotheses were tested: 1) coating or imbibition of seeds, without inclusion of SA, will  
100 not deleteriously impact seed germination success in laboratory trials or seedling emergence in the  
101 field, 2) SA will improve germination under conditions of water stress and enhance seed germination  
102 and seedling emergence in the field, and 3) plant survival and growth in the field will be improved  
103 for plants established from SA treated seeds at low and high intraspecific competition.

## 104 Material and methods

### 105 Species selection and seed processing

106 Three species of grasses native to temperate and Mediterranean regions of southern Australia were  
107 selected on the basis of their predominance in grassland revegetation and restoration activities and  
108 utility as pasture [38], including *Austrostipa scabra* (Lindl.) S.W.L. Jacobs & J.Everett, *Microlaena*  
109 *stipoides* (Labill.) R.Br. var. *Griffin* and *Rytidosperma geniculata* (J.M.Black) Connor & Edgar var.  
110 *Oxley* (all Poaceae). Seeds were sourced from a commercial provider (Native Seed Pty Ltd,  
111 Cheltenham, Victoria) in 2016. To reduce potential for viability loss seeds were stored in paper bags  
112 on open shelving in a controlled environment (15°C, and 15% relative humidity, RH) for one year  
113 prior to experimentation [39]. Seeds were moved to ambient condition (20–25°C and 40–50% RH)  
114 two weeks prior to experimentation to avoid potential seed damage during the cleaning and  
115 encrusting process [40].

116 Caryopses of each species were extracted from the husk to allow for more homogeneous encrusting  
117 and imbibition treatment. Removal of the palea and lemma was performed for each species using  
118 sulphuric acid digestion *sensu* Stevens *et al* 2015 [41], with complete immersion of the caryopsis in a  
119 50% sulphuric acid solution (ACS reagent grade H<sub>2</sub>SO<sub>4</sub>, Sigma-Aldrich, St Louis, USA) for an optimal

120 interval allowing for the weakening of floret structures without reducing germination potential.  
121 Immersion time for all three species was determined by Pedrini *et al* 2018 [42], and thus immersion  
122 intervals were 90 min for *A. scabra*, 60 min for *M. stipoides* and 20 min for *R. geniculata*. Acid  
123 immersion was followed by a neutralisation treatment in a 8.4 g L<sup>-1</sup> sodium bicarbonate (NaHCO<sub>3</sub>,  
124 Sigma-Aldrich, St Louis, USA) solution for 5 minutes, before rinsing under tap water for two minutes  
125 and drying in a Food Lab™ Electronic Dehydrator at 35° C (Sunbeam, Sydney, Australia). After drying,  
126 caryopsis extraction was achieved by gentle rubbing with a rubber mat and sequential sieving and  
127 zig-zag air flow separator (Selecta Machinefabriek BV, Enkhuizen, Netherlands).

## 128 Seed treatments

129 After cleaning, caryopses (hereafter referred to as 'seeds') of each species were subjected to seed  
130 imbibition or coating treatments with or without salicylic acid application (Fig 1), resulting in four  
131 treatments (imbibed seeds without SA, imbibed seeds with SA, coated seeds without SA, coated with  
132 SA) plus an untreated control (uncoated, unimbibed seeds without SA). The coating treatment used  
133 in this experiment is defined encrusting, because the size and weight of the seed were increased but  
134 the shape of the seed remained evident [24].

135 SA was provided at a concentration of 0.1 mM, a concentration previously shown to be sufficient in  
136 conferring stress resistance across various species and delivery methods [31,43,44]. SA solution was  
137 prepared by dissolving crystalline SA (Sigma Aldrich, St. Louis, USA) in deionized water for imbibition,  
138 and in a 2% Hydroxyethyl cellulose hydroxyethyl cellulose (cellosize QP 09-L, DOW chemicals)  
139 solution for encrusting (mixed with a magnetic stirrer for 30 minutes at 50°C). For imbibition  
140 treatments seeds were soaked in either SA solution or deionized water for 24 h at 20°C.

141 Seed encrusting was performed on a 15 cm RRC 150 Lab Coater (Centor Thai, Bangkok, Thailand),  
142 *sensu* Pedrini et al. (2018). Liquids were delivered through a compressed air-propelled 0.7 mm  
143 airbrush (Ozito tools, Australia). Talc was used as the filler material, dusted onto the seeds with a  
144 paint brush. Cleaned seeds (10 g) were placed inside the rotary coater, with rotor speed set at 300

145 RPM, and seeds were initially exposed to liquid spray until moist before powder was dusted onto the  
146 rotating seed mass. Wetting and dusting were repeated until 20 g of powder were used. A total of 15  
147 ml of liquid were applied. Seeds were routinely checked to visually evaluate the even coverage of  
148 the coat, and to assess the formation of multiple seeds or dead balls (agglomerate of coating  
149 material not containing a seed). Following imbibition and encrusting treatments, seeds were placed  
150 on trays and dried for 3 hours in a in a Food Lab™ Electronic Dehydrator at 35° C (Sunbeam, Sydney,  
151 Australia).

## 152 **Laboratory test**

153 Germination tests were performed in Petri dishes lined with two filter papers moistened with 14 ml  
154 water or Polyethylene Glycol (PEG) solution, placed in sealed plastic bags to reduce desiccation. 2 ml  
155 of water or PEG solution was added weekly.

156 In order to test whether SA improved germination success under water-limited conditions PEG 8000  
157 (Sigma-Aldrich, St Louis, USA) diluted in deionised water at 24.72, 30.78, and 35.90 g/l was used to  
158 obtain solutions of -0.6, -0.9, and -1.2 MPa water potential at 20° C. This value resembles the range  
159 of water availability recorded in the field during the winter months. Germination tests were  
160 performed on four replicates of 25 seeds for each of the five seed treatments. Petri dishes were  
161 placed in a Biosyn incubator 6000 OP (Contherm, Korokoro, New Zealand) at 20°C with a 12 h  
162 photoperiod.

163 Germination was scored daily for the first five days and then at 7, 10 and 15 days respectively. On  
164 the 21st day, final germination was scored and remaining seed examined via cut test to assess  
165 viability. Non-viable seeds were excluded from the total.

## 166 **Field trials**

167 Field trials were performed at a site east of the town of Waroona in Western Australia (32° 74' 27" S,  
168 116° 00' 36" E, 201 m above sea level). The site falls within the native range of all three tested

169 species and offers climatic conditions similar to those of mining operations active in the area likely to  
170 require these species in seed-based rehabilitation following mine closure. The field trial area was  
171 enclosed by a fence to avoid grazing from native marsupials and rabbits. Three experiments were  
172 performed in the field site: 1) seed germination in recoverable porous bags, 2) seedling emergence  
173 and survival in precision planted lines, and 3) plant survival and growth in plots. The five treatments  
174 previously described were tested in each experiment. For germination experiments in bags and lines,  
175 each treatment had four replicates. All experiments were arranged on a randomised complete block  
176 design of four blocks for 15 treatments (5 treatments \* 3 species). For inline and plot experiments,  
177 seed were sown at depths of 0.2 - 0.5 cm, achieved by broadcasting dry soil on top of freshly sown  
178 lines and plots. All experiments were established at the commencement of the wet season in May  
179 2017.

#### 180 **Germination bags experiment**

181 Field seed germination was tested by placing 50 seeds in 5 cm<sup>2</sup> sealed mesh bags, over a 2 m<sup>2</sup> area,  
182 and buried on site at 1cm depth. The bags were collected three weeks after sowing and germination  
183 recorded for those seeds as indicated by a protruding radicle.

#### 184 **Line experiment – high competition**

185 Seedling emergence was tested by sowing 100 seeds along a meter-long line, 5 cm wide. Seedling  
186 emergence was scored after 1, 2, 3, 4 6, 8 and 10 weeks. All emerged seedlings were left to then  
187 grow to maturity and resulted in high intraspecific competition. Plant survival was recorded 45  
188 weeks after sowing.

#### 189 **Plot experiment – low competition**

190 To evaluate plant survival and growth under low intraspecific competition, 100 seeds were manually  
191 broadcasted on a 0.5 x 0.5 m<sup>2</sup> plot. A month after sowing, the plots were thinned to 10 seedlings  
192 randomly selected, with at least 5 cm between seedlings, to limit potential competition resulting in a



193 density of 40 plant/m<sup>2</sup>. The selected seedlings were marked with a pin to avoid confusion with other  
194 seedlings that could have emerged at a later stage. 45 weeks after sowing the surviving plants were  
195 counted, harvested and their height, wet weight and dry weight recorded.

196 Soil temperature and volumetric moisture content (m<sup>3</sup>/m<sup>3</sup>) were recorded for the duration of the  
197 germination and emergence experiment (10 weeks) with HOBO Micro Station Data Loggers (Onset  
198 Computer Corporation, Bourne, MA, USA). The probes were buried at 1 cm. For the 35 weeks  
199 following the end of the emergence experiment (July 2017 – March 2018), minimum and maximum  
200 temperature and precipitation data were obtained from the Dwellingup weather station, 10 km from  
201 the site [45] (**Fig 2**).

## 202 Statistical analysis

203 To assess laboratory germination and seedling emergence in the field, non-linear regression models  
204 were fitted with the function “drm” of the “DRC” package [13,46,47]. A three parameter log-logistic  
205 model was used:

$$206 \quad f(x) = \frac{gmax}{1 + \left(\frac{x}{T50}\right)^b}$$

207 The parameters are: (b) slope curvature, (gmax) final germination and (T50) germination speed,  
208 intended as time (days/weeks) required to reach half of the final germination or emergence.

209 Parameter comparison on final germination and germination speed were then performed to assess  
210 differences among treatment (significance p <0.05).

211 To test the hypothesis of treatment and compound effect on germination in the field (in buried bags)  
212 and plant survival, an exact binomial test on the probability of success in a Bernoulli trial, between  
213 each treatment, was performed (confidence level = 0.95).

214 Plant height and biomass data were fitted in a Linear Mixed-Effects Model using the “lmer” function  
215 in the lme4 package for R [48], using compounds; untreated control (ctrl) vs treated without SA (NO)

216 vs treated with SA (SA), and treatment; untreated control (ctrl), imbibed (Imb) and Encrusted (Encr)  
217 as fixed variables and the replicates (plots) as a random variable.  
218 ANOVA (Type II Wald chi square tests) was employed to detect significant treatment effects. If such  
219 significance was detected a pairwise t-test was performed to compare the levels within the  
220 treatment. All data analysis was performed in the R statistical environment [49].

221

222 **Fig 1. Seeds of the three grass species tested.** In each image are presented the encrusted (blue) and untreated-imbibed  
223 seed. Scale bars indicate seed sizes.

224

225 **Fig 2. Climate condition at the field site.** (A) the daily average for day (orange) and night (blue) temperature (B) volumetric  
226 water content in the soil at 1 cm depth for the first 10 weeks of the experiment, when germination and emergence were  
227 recorded. (C) Weekly maximum (tMax) and minimum (tMin) temperature, and total precipitation (Prec (mm)) for the  
228 period between the end of the emergence experiment and the recording of plant survival (July 2017 – March 2018) at a  
229 nearby meteorological station.

230

## 231 Results

232 In the first two sections are reported the results of seed germination under laboratory conditions  
233 and seed germination/emergence in the field experiment, with the third section covers plant survival  
234 and growth data, collected at the field site.

### 235 Encrusting and imbibition treatment

236 Encrusting treatment (Encr) had higher or similar germination than the control (Ctrl), whilst  
237 imbibition treatment (Imb) at times resulted in lower germination. Final germination of *A. scabra*  
238 treated seed, tested in lab conditions, was not significantly different from the untreated control, and  
239 only slightly but significantly ( $P < 0.001$ ) increased in germination speed (T50) of 0.5 days, for both  
240 imbibed and encrusted seed. When tested in field conditions, the encrusted seed had lower final  
241 emergence than the control (Ctrl:  $52 \pm 1.6\%$ , Encr:  $45 \pm 2.4\%$ ,  $P < 0.001$ ) while imbibed seeds showed  
242 no significant difference (**Fig 3**).

243 Under laboratory conditions encrusted *M. stipoides* seeds ( $86 \pm 2.1\%$ ) germination was higher than  
244 in the control ( $73 \pm 2.2\%$ ,  $P < 0.001$ ), but 8.9% lower for imbibed seed ( $P < 0.05$ ). Similarly, final  
245 emergence in the field was higher for encrusted seed (Encr:  $48 \pm 1.0\%$ , Ctrl:  $35 \pm 1.0\%$ ) with  
246 imbibition increasing emergence by 4% ( $P < 0.05$ ).

247 As with *M. stipoides*, germination of *R. geniculatum* was significantly higher for encrusted seeds ( $68$   
248  $\pm 1.5\%$ ) with the lowest for imbibed seeds ( $51 \pm 1.4\%$ ), (Ctrl:  $58 \pm 1.5\%$ ). However, there was no  
249 difference in seeding emergence in response to seed treatment under field conditions.

## 250 Salicylic acid effects on germination with low water availability and 251 field emergence

252 To assess the effect of SA, seeds that were provided SA (via imbibition and encrusting) were  
253 compared to seeds that received the treatments without SA (NO). If a significant difference was  
254 detected, SA delivery methods of encrusting (ES) and imbibing (IS) were then compared. The high  
255 variability in the results suggested that SA has limited effects on promoting germination and  
256 emergence.

257 Final germination at optimal water potentials in *A. scabra* was significantly ( $P < 0.05$ ) reduced by  
258 4.3% with SA treatment (**Error! Reference source not found.**). At reduced water availability of -0.6, -  
259 0.9, and -1.2 MPa SA treatments generally showed a slight but non-significant improvement in final  
260 germination. When tested in the field, SA treatments did not affect germination but reduced final  
261 emergence (NO:  $51 \pm 1.1\%$ , SA:  $44 \pm 1.1\%$ ,  $P < 0.001$ ) with SA encrusted seed emerging 5.6% lower  
262 than SA imbibed seeds.

263 Similarly, *M. stipoides* germination at optimal conditions was reduced in SA treated seed by 7.9%  
264 ( $P < 0.05$ ). SA delivered through encrusting resulted in better germination ( $77 \pm 2.1\%$ ) than SA  
265 imbibed seed ( $57 \pm 2.2\%$ ). Under limiting water potentials of -0.6 MPa, germination for SA treated  
266 seed was improved from  $77\% \pm 1.9\%$  to  $86 \pm 1.9\%$ , and encrusting allowed for a 12.7% increase in

267 germination compared to imbibing. However, at lower water potentials, SA treatment reduced final  
268 germination by 5.6% ( $P < 0.05$ ) at -0.9 MPa and by 11.2% ( $P < 0.01$ ) at -1.2MPa. In both situations  
269 encrusting allowed for better germination than imbibition. Field germination and emergence of *M.*  
270 *stipoides* were not significantly affected by SA treatment, but both treatments had higher  
271 emergence than the untreated control.

272 When final germination was tested on *R. geniculatum*, no significant difference between seed  
273 treated with and without SA was detected at optimal conditions and with reduced water availability.  
274 The only effect of SA was a delay in germination at 0.0MPa of 0.4 days. Field germination was no  
275 different for seed treated with and without SA, however both treatments had lower germination  
276 than the untreated control. Between seeds treated with and without SA, there was no difference in  
277 field emergence. However, seed treated without SA had significantly lower germination ( $p < 0.05$ )  
278 than the untreated control. Emergence in SA treated seeds was slightly higher, but not significant.  
279 The results of germination and emergence experiment are provided in the supplementary file  
280 S1\_GerminationEmergenceAnalysisResults.pdf.

## 281 **Survival and plant growth in field site conditions**

282 Plant survival was examined in situations where intraspecific competition was maintained high (line  
283 experiment) or reduced (plot experiment). In both scenarios, SA improved plant survival and growth.  
284 In the “line experiment” the survival of plants that emerged from untreated seed was 32.3% for *A.*  
285 *scabra*, 41.2% for *M. stipoides* and 42.6% for *R. geniculatum*. Plants emerging from SA treated seed,  
286 compared to seeds treated without SA, had a significantly ( $P > 0.001$ ) increased survival by 12.9% in *A.*  
287 *scabra*, 13.5% in *M. stipoides* and 11.8% in *R. geniculatum*. In *A. scabra*, SA delivered through  
288 encrusting improve survival by 9.8% ( $P > 0.001$ ) compared to SA delivered through imbibing. In *M.*  
289 *stipoides* and *R. geniculatum*, no difference was detected between SA delivery systems on plant  
290 survival.

291 In the plot experiment, the average survival of seedlings in the untreated control was of 82.5% for *A.*  
292 *scabra*, 82.5% for *M. stipoides* and 77.5% for *R. geniculatum*. In SA treated *M. stipoides* and *R.*  
293 *geniculatum*, compared treated without SA, survival was significantly improved ( $P < 0.01$ ), by 8.2%  
294 and 15% respectively and in *A. scabra*, survival was improved by 6.25%, but the difference was not  
295 significant. SA delivered through encrusting provided slightly better but non-significant survival. Both  
296 for *M. stipoides* and *R. geniculatum*, SA treatment improve survival by 17.5% and 10% respectively,  
297 compared to seed treated without SA (**Error! Reference source not found.**).

298 Plant growth was recorded in term of plant height and above ground dry biomass. In *A. scabra*, no  
299 significant difference was detected between SA and non-SA treatments in either measurement. For  
300 *M. stipoides*, plant height for SA treated seed was significantly improved ( $P < 0.05$ ) from 41 cm  $\pm$  1.7  
301 cm (untreated control) and 43 cm  $\pm$  1.0cm (treated seed without SA), to 46 cm  $\pm$  1.0 cm. Dry above-  
302 ground biomass was also higher in SA treatment (3.4 g  $\pm$  0.22g) compared to untreated controls (2.2  
303 g  $\pm$  0.25 g) and without SA (2.7 g  $\pm$  0.25 g) (both  $P < 0.05$ ). In *R. geniculatum*, there was no significant  
304 difference in height. Dry biomass for SA treatment (1.5 g  $\pm$  0.08g) was significantly higher ( $P > 0.05$ )  
305 than treated without SA (1.2 g  $\pm$  0.10g), but not significant compared to the untreated control (1.3 g  
306  $\pm$  0.09g). No significant difference between SA delivery through imbibing or encrusting, in terms of  
307 plant growth, was detected in the study species.

308

309 **Fig 3. Seed treatment germination and emergence curves.** Cumulative germination/emergence percentage curves of the  
310 three different seed treatment tested: untreated (ctrl), encrusted (Encr), and imbibed (Imb) across the three species  
311 tested. The lines represent the cumulative germination curve over time. Data points are the germination recorded on a  
312 specific day/week and the shaded areas represent the 95% confidence intervals. A, B and C germination experiments were  
313 in controlled laboratory condition. D, E and F seedling emergence in the field trial.

314

315 **Fig 4. Salicylic Acid final germination and emergence** Final germination and emergence of untreated seeds (Ctrl), seed  
316 treated without salicylic acid (No) and seed treated with salicylic acid (SA). A, B and C shows the laboratory germination  
317 experiment in petri dishes at 20°C at different water potentials (X axis). D, E shows the germination and emergence results  
318 in the field experiment, 3 and 10 weeks after sowing respectively. The species are listed in the X axis (Aus = *Austrostipa*  
319 *scabra*, Mic = *Microlaena stipoides*, Ryt = *Rytidosperma geniculatum*). Results followed by the same letter for the Water  
320 potential (lab experiment) and species (Field experiment) are not statistically different at  $p < 0.05$

321

322 **Fig 5. Survival and plant growth.** Survival and plant growth comparison 40 weeks after sowing, between untreated seeds  
323 (Ctrl), seed treated without salicylic acid (No) and seed treated with salicylic acid (SA). (A) plant survival proportion in the  
324 plot experiment, where interspecific competition was limited, by removing excess seedlings and leaving 10 seedling per  
325 0.25 m<sup>2</sup> plot. (C) Seeds sown on a 1 m line, without thinning. (C) Average height and (D) biomass of plant collected from  
326 the plot experiment. Results followed by the same letter are not statistically different at  $p < 0.05$ .

## 327 Discussion

### 328 Seed treatment effects on germination and emergence

329 Of the three species tested, only *A. scabra* showed no treatment (encrusting and imbibition) effect  
330 on germination and emergence as predicted. *M. stipoides* and *R. geniculatum* showed unexpected,  
331 significant differences between treated seeds (imbibed and encrusted) and the control. In the  
332 germination experiment, the two species behaved similarly, with encrusted seeds performing better  
333 than controls, while imbibition had negative effects on both final germination and germination  
334 speed. In this study, seeds were imbibed for 24 hours, following previously described methodology  
335 for SA delivery to seeds [33,50]. A potential explanation for the reduction in germination of imbibed  
336 seed could be anoxic stress due to extended submersion in water and in a water-saturated  
337 environment (petri dish). This problem has been reported in seed priming treatments that rely on  
338 seed imbibition to trigger pre-germinative metabolic mechanisms [51,52]. Oxygen availability could  
339 also explain why encrusted seed performed better than imbibed and untreated seed. During the  
340 encrusting process, seed contact with water was limited compared to imbibing. Moreover, the layer  
341 of encrusting material could also have acted as a buffer, reducing the water potential at the seed  
342 level and allowing for improved gas exchange. Furthermore, the emergence of imbibed seed was  
343 unaffected in the moist, but not water-saturated soil conditions. In seed priming treatments, water  
344 potential or water oxygenation are usually regulated [53] to avoid anoxic damage. The germination  
345 reduction detected in this study for imbibed seed could, therefore, be mitigated by decreasing  
346 imbibition time, reducing the water potential, or providing oxygenation to the solution.

## 347 Salicylic acid effect on seed germination and emergence

348 Contrary to what was initially hypothesised, SA application did not clearly improve seed germination  
349 and emergence in the field and in controlled laboratory condition across a water availability gradient  
350 on the tested species, with the exception of *M. stipoides* at -0.6 MPa. *M. stipoides* seed treated with  
351 SA had significantly lower germination at 0.0, -0.9 and -1.2 MPa, suggesting that this species might  
352 be susceptible to the SA concentration tested. Germination response to exogenous SA application is  
353 concentration dependent, with inhibition detected at higher concentrations [35]. Reducing SA  
354 concentration for *M. stipoides*, could therefore potentially remove the germination impediments.  
355 When a difference in germination was detected for seed treated with SA, encrusted seed performed  
356 slightly better than imbibed seeds. However, this difference is most likely due to the process itself,  
357 as highlighted previously, other than the efficacy in delivering SA.

358 A significant drop in emergence by SA treated seed in *A. scabra* might suggest that the interaction of  
359 SA treatment with unidentified variables present in the soil at field site might have triggered a  
360 negative response, similar to what was observed in the controlled lab environment. Moreover, the  
361 detrimental effect of encrusting could have been determined by the combined effect of SA and the  
362 physical constraint of the coatings layer and soil to the emerging seedling. However, this effect was  
363 not detected in the other species.

## 364 Survival and growth

365 In experimental plots where competition was reduced, plants from seed treated with SA resulted in  
366 increased height and biomass production in two out of the three species tests. SA also provided a  
367 significant improvement in plant survival in both scenarios with and without interspecific  
368 competition. Although response among species varied, with the least effects detected in *A. scabra*,  
369 the overall trend showed marked benefits in term of survival and plant grown from SA-treated  
370 seeds. The improved survival at this stage could be explained by the already described stress  
371 resistance properties of SA [44]. A potentially significant, yet unintended, result of this experiment is

372 the great difference in plant survival between the low and high seedling density (line and plot  
373 experiment). According to the seedling emergence data, the seedling density in the line experiment  
374 was of 520 seedling/m<sup>2</sup> in *A. scabra*, 430 seedling/m<sup>2</sup> in *M. stipoides* and 280 seedling/m<sup>2</sup> in *R.*  
375 *geniculatum*, whilst for the plot experiment seedling density was 40 seedling/m<sup>2</sup> across all species.  
376 Based on personal observations, the plants with limited competition were generally more developed  
377 before summer than the ones in the lines. This would have allowed for the development of a  
378 broader and deeper root system with better access to water during the dry summer months  
379 ultimately resulting in higher chances of survival. These results suggest that intraspecific competition  
380 within these species could play a major role in seedling establishment rate. This factor needs to be  
381 taken in consideration when planning for seeding operation, to avoid overseeding and wastage of  
382 valuable and expensive seeds [54].

### 383 Demographic processes

384 In field experiments, soil conditions at the time of germination and emergence (**Error! Reference**  
385 **source not found.**) were suitable for the germination of these temperate grass species. Differently  
386 to what was described by James et al. (2011), where the major bottleneck in seedling recruitment  
387 was detected at the emergence phase (when germinated seeds failed to push through the soil), in  
388 this experiment, the drop between germination and emergence was relatively small with probability  
389 of emergence from germinated seed ranging from 0.92 in *A. scabra* to 0.61 in *R. geniculatum* (**Fig 6**).  
390 This trend might be due to the favourable climatic and soil conditions during the year the study was  
391 conducted, with average night and daily temperature ranging between 10° C and 18° C, and  
392 maintained soil moisture content of 0.08-0.18m<sup>3</sup>/m<sup>3</sup> (water potential range between -0.2 and -0.7  
393 MPa) during the first month after sowing, when most of the emergence occurred. These conditions  
394 have not allowed for the detection of the stress reduction proprieties of SA that were originally  
395 hypothesised at the germination and emergence phase. However, the field data, combined with the  
396 controlled germination experiment with reduced water availability, suggest that SA might not affect



397 seed performances at the establishment phase, as suggested by [34]. Further studies are needed to  
398 test this hypothesis under more severe stress conditions and on different species.

399 Significant effects of SA delivering stress resistance were instead detected on the survival of  
400 established plants over the summer when seedlings had to endure prolonged periods with little  
401 access to water. Total precipitation between November 2017 and February 2018, removing two  
402 major rainy events that happened over a short period (60 mm on December 20<sup>th</sup> and 147 mm on  
403 January 18<sup>th</sup>) were less than 30 mm (Fig 2). The effects of the summer drought were evident on the  
404 experiment where seedlings were not removed, with the probability of plant survival from an  
405 emerged seedling being 0.32 for *A. scabra*, 0.41 for *M. stipoides* and 0.42 for *R. geniculatum*. In this  
406 case, SA treated seed survived significantly better than the seed treated without SA for the three  
407 species. When considering the cumulative survival from the number of seeds initially sown, SA  
408 treatment provides a significantly higher number of successful plant establishment events, even for  
409 *A. scabra*, when emergence of SA treated seed was lower than the seed treated without SA.

#### 410 **SA effect on survival**

411 In both line and plot experiments, SA treated seeds improved survival, supporting previous evidence  
412 that SA exogenous application may deliver drought stress resistance [43]. This improvement in  
413 survival might be due to a variety of factors, such as the effect of SA in mediating reactive oxygen  
414 species (ROS) and triggering defence-related processes [55], and its effect on productivity and  
415 growth [56]. In this study, just one of the three species tested (*M. stipoides*) showed a higher  
416 biomass production as a response to SA treatment. A previously published study reported that  
417 externally applied SA had increased root development [57], but root growth was not evaluated in  
418 this study. Nevertheless, as this study shows, the effects of exogenous SA delivery are still present  
419 months after its application. SA absorbed through the seed (imbibing), or through emerging radicle  
420 and roots (encrusting) could be converted in SA glucoside and transferred in the vacuole for storage

421 [58]. SA glucoside could be mobilized and moved through the plant after been converted in methyl  
422 salicylate, and eventually turned back to SA when needed [27].

## 423 Encrusting and imbibition

424 When SA delivery mechanisms of imbibing and encrusting were compared in terms of improving  
425 plant survival, a significant difference was rarely detected, suggesting that seed encrusting could be  
426 used to deliver SA and its stress resistance inducing proprieties. The advantage of using SA in the  
427 seed coating processes over imbibition lies in the capability of storing seed after treatment. Seed  
428 imbibition can trigger a seed priming effect that could improve germination speed and synchronicity  
429 in the short term [59], but, such imbibition could accelerate seed ageing processes, reducing seed  
430 shelf-life and storability [60]. Another advantage of seed coating over imbibition is that while it  
431 delivers SA stress resistance, it can also improve seed handling and sowability, along with a wide  
432 variety of active ingredients, such as protectants, micronutrients, germination promoters and  
433 microorganism [24]. Most of these coating treatments still need to be tested on native species for  
434 restoration, but their combined impact on seed germination, emergence, growth and plant  
435 establishment could improve the successful deployment of native seed onto degraded landscapes,  
436 ultimately allowing for a more cost-effective seed-based restoration.

437

438 **Fig 6. Cumulative survival proportion.** Demographic process through various life stages for the three species tested  
439 without treatment, treated without SA and treated with SA. On the top of each graph, in red, are reported the probability  
440 of transitioning between life stages. This demographic data are based on the “in line’ experiment whereas seedling were  
441 not removed after emergence and intraspecific competition affected plant survival.

## 442 Acknowledgements

443 We acknowledge that the research undertaken and presented here was done on Wadjuk Noongar  
444 country and pay our respects to their elders, past, present and emerging.

445 This study is dedicated to the memory of the late Dr Tissa Senaratna who was instrumental in  
446 establishing salicylic acid as a key principle for improving plant growth and development and without  
447 whom this and many other studies would not have been possible.

448 S.P. was the recipient of a Curtin University International Postgraduate Research Scholarship. A.T.C is  
449 the recipient of the Research Fellowship in Restoration Ecology jointly funded by the EcoHealth  
450 Network, Gelganyem Limited, and Curtin University. Seed were donated by Native Seed Pty Ltd. This  
451 research was supported by the Australian Government through the Australian Research Council  
452 Industrial Transformation Training Centre for Mine Site Restoration (Project Number ICI150100041).  
453 The views expressed herein are those of the authors and are not necessarily those of the Australian  
454 Government or Australian Research Council.

## 455 References

- 456 1. Nellemann C, Corcoran E. Dead Planet , Living Planet. Biodiversity and ecosystem restoration  
457 for sustainable development. Nellemann C, Corcoran E, editors. Challenges. Norway: United  
458 Nations Environment Programme, GRID-Arendal; 2010.
- 459 2. Costanza R, Arge R, de Groot R, Farberk S, Grasso M, Hannon B, et al. The value of the world  
460 's ecosystem services and natural capital. *Nature*. 1997;387: 253–260. doi:10.1038/387253a0
- 461 3. Palmer MA, Filoso S. Restoration of Ecosystem Services for Environmental Markets. *Science*  
462 (80- ). 2009;325: 575–576. doi:10.1126/science.1172976
- 463 4. Society for Ecological Restoration International Science & Policy Working Group. The SER  
464 International primer on ecological restoration. *Ecol Restor*. Tucson; 2004. Available:  
465 <http://scholar.google.com/scholar?hl=en&btnG=Search&q=intitle:The+SER+International+Pri+mer+on+Ecological+Restoration#2>  
466
- 467 5. Gann GD, McDonald T, Walder B, Aronson J, Nelson CR, Jonson J, et al. International  
468 principles and standards for the practice of ecological restoration. Second edition. *Restor*  
469 *Ecol*. 2019;27. doi:10.1111/rec.13035
- 470 6. Suttie JM, Reynolds SG, Batello C. GRASSLANDS of the WORLD. J.M. Suttie, S.G. Reynolds CB,  
471 editor. Rome: Food and Agriculture Organization of the United Nations; 2005. Available:  
472 <http://www.fao.org/docrep/008/y8344e/y8344e00.htm>
- 473 7. O'Mara FP. The role of grasslands in food security and climate change. *Ann Bot*. 2012;110:

- 474 1263–1270. doi:10.1093/aob/mcs209
- 475 8. Gang C, Zhou W, Chen Y, Wang Z, Sun Z, Li J, et al. Quantitative assessment of the  
476 contributions of climate change and human activities on global grassland degradation.  
477 *Environ Earth Sci.* 2014;72: 4273–4282. doi:10.1007/s12665-014-3322-6
- 478 9. Gibson DJ. *Grasses and Grassland Ecology*. New York: Oxford University Press; 2009.
- 479 10. Conrad MK, Tischew S. Grassland restoration in practice: Do we achieve the targets? A case  
480 study from Saxony-Anhalt/Germany. *Ecol Eng.* 2011;37: 1149–1157.  
481 doi:10.1016/j.ecoleng.2011.02.010
- 482 11. Pedrini S, Dixon KW. International principles and standards for native seeds in ecological  
483 restoration. *Restor Ecol.* 2020;28: 286–303. doi:10.1111/rec.13155
- 484 12. Cross AT, Stevens JC, Dixon KW. One giant leap for mankind: can ecopoiesis avert mine  
485 tailings disasters? *Plant Soil.* 2017;421: 1–5. doi:10.1007/s11104-017-3410-y
- 486 13. Lewandowski W, Erickson TE, Dixon KW, Stevens JC. Increasing the germination envelope  
487 under water stress improves seedling emergence in two dominant grass species across  
488 different pulse rainfall events. Firn J, editor. *J Appl Ecol.* 2017;54: 997–1007.  
489 doi:10.1111/1365-2664.12816
- 490 14. Orrock JL, Witter MS, Reichman OJ. APPARENT COMPETITION WITH AN EXOTIC PLANT  
491 REDUCES NATIVE PLANT ESTABLISHMENT. *Ecology.* 2008;89: 1168–1174. doi:10.1890/07-  
492 0223.1
- 493 15. James JJ, Svejcar TJ, Rinella MJ. Demographic processes limiting seedling recruitment in arid  
494 grassland restoration. *J Appl Ecol.* 2011;48: 961–969. doi:10.1111/j.1365-2664.2011.02009.x
- 495 16. Pyke DA. Comparative demography of co-occurring introduced and native tussock grasses:  
496 persistence and potential expansion. *Oecologia.* 1990;82: 537–543. doi:10.1007/BF00319798
- 497 17. Merritt DJ, Dixon KW. Restoration Seed Banks--A Matter of Scale. *Science (80- ).* 2011;332:  
498 424–425. doi:10.1126/science.1203083
- 499 18. Menz MHM, Dixon KW, Hobbs RJ. Hurdles and Opportunities for Landscape-Scale  
500 Restoration. *Science (80- ).* 2013;339: 526–527. doi:10.1126/science.1228334
- 501 19. Pedrini S, Merritt DJ, Stevens J, Dixon K. Seed Coating: Science or Marketing Spin? *Trends*  
502 *Plant Sci.* 2017;22: 106–116. doi:10.1016/j.tplants.2016.11.002
- 503 20. Taylor AG, Allen PS, Bennett M a., Bradford KJ, Burris JS, Misra MK. Seed enhancements. *Seed*  
504 *Sci Res.* 1998;8: 245–256. doi:10.1017/S0960258500004141
- 505 21. Madsen MD, Kostka SJ, Hulet A, Mackey BE, Matthew A. Surfactant Seed Coating – a Strategy  
506 To Improve Turfgrass Establishment on Water Repellent Soils. In: Castelani P, editor.  
507 *Proceedings of the 10th International Symposium on Adjuvants for Agrochemicals, ISAA 2013,*

- 508 22-26 April, Foz Do Iguaçu, Brazil, Organized Under the Auspices of ISAA Society. ISAA Society;  
509 2013. pp. 205–210.
- 510 22. Madsen MD, Davies KW, Williams CJ, Svejcar TJ. Agglomerating seeds to enhance native  
511 seedling emergence and growth. *J Appl Ecol.* 2012;49: 431–438. doi:10.1111/j.1365-  
512 2664.2012.02118.x
- 513 23. Pearson DE, Valliant M, Carlson C, Thelen GC, Ortega YK, Orrock JL, et al. Spicing up  
514 restoration: can chili peppers improve restoration seeding by reducing seed predation?  
515 *Restor Ecol.* 2019;27: 254–260. doi:10.1111/rec.12862
- 516 24. Pedrini S, Balestrazzi A, Madsen MD, Bhalsing K, Hardegree SP, Dixon KW, et al. Seed  
517 enhancement: getting seeds restoration-ready. *Restor Ecol.* 2020;28: rec.13184.  
518 doi:10.1111/rec.13184
- 519 25. Raskin I, Skubatz H, Tang W, Meeuse BJD. Salicylic acid levels in thermogenic and non  
520 thermogenic plants. *Ann Bot.* 1990;66: 369–373.
- 521 26. Rivas-San Vicente M, Plasencia J. Salicylic acid beyond defence: Its role in plant growth and  
522 development. *Journal of Experimental Botany.* 2011. pp. 3321–3338. doi:10.1093/jxb/err031
- 523 27. Park S, Kaimoyo E, Kumar D, Mosher S, Klessig DF. Methyl salicylate is a critical mobile signal  
524 for plant systemic acquired resistance. *Science.* 2007;318: 113–116.  
525 doi:10.1126/science.1147113
- 526 28. Dat JF, Capelli N, Van Breusegem F. The Interplay Between Salicylic Acid and Reactive Oxygen  
527 Species During Cell Death in Plants. *Salicylic Acid: A Plant Hormone.* 2007. pp. 247–276.  
528 doi:10.1007/1-4020-5184-0\_9
- 529 29. Horvat E, Gabriella S, Janda T. Induction of Abiotic Stress Tolerance by Salicylic Acid Signaling.  
530 *J Plant Growth Regul.* 2007;26: 290–300. doi:10.1007/s00344-007-9017-4
- 531 30. Senaratna T, Touchell D, Bunn E, Dixon K. Acetyl salicylic acid (Aspirin) and salicylic acid  
532 induce multiple stress tolerance in bean and tomato plants. *Plant Growth Regul.* 2000;30:  
533 157–161. doi:10.1023/A:1006386800974
- 534 31. Stevens J, Senaratna T, Sivasithamparam K. Salicylic acid induces salinity tolerance in tomato  
535 (*Lycopersicon esculentum* cv. Roma): Associated changes in gas exchange, water relations  
536 and membrane stabilisation. *Plant Growth Regul.* 2006;49: 77–83. doi:10.1007/s10725-006-  
537 0019-1
- 538 32. Lee S, Park C-M. Modulation of reactive oxygen species by salicylic acid in *Arabidopsis* seed  
539 germination under high salinity. *Plant Signal Behav.* 2010;5: 1534–1536.  
540 doi:10.4161/psb.5.12.13159
- 541 33. Sharafizad M, Naderi A, Ata siadat S, Sakinejad T, Lak S. Effect of Salicylic Acid Pretreatment

- 542 on Germination of Wheat under Drought Stress. *J Agric Sci.* 2013;5: 179–199.  
543 doi:10.5539/jas.v5n3p179
- 544 34. Xie Z, Zhang ZL, Hanzlik S, Cook E, Shen QJ. Salicylic acid inhibits gibberellin-induced alpha-  
545 amylase expression and seed germination via a pathway involving an abscisic-acid-inducible  
546 WRKY gene. *Plant Mol Biol.* 2007;64: 293–303. doi:10.1007/s11103-007-9152-0
- 547 35. Guan L, Scandalios JG. Developmentally related responses of maize catalase genes to salicylic  
548 acid. *Proc Natl Acad Sci U S A.* 1995;92: 5930–5934. doi:10.1073/pnas.92.13.5930
- 549 36. Guan Y, Cui H, Ma W, Zheng Y, Tian Y, Hu J. An Enhanced Drought-Tolerant Method Using SA-  
550 Loaded PAMPS Polymer Materials Applied on Tobacco Pelleted Seeds. *Sci World J.*  
551 2014;2014: 9. doi:10.1155/2014/752658
- 552 37. Guan Y, Li Z, He F, Huang Y, Song W, Hu J. “On-Off” Thermoresponsive Coating Agent  
553 Containing Salicylic Acid Applied to Maize Seeds for Chilling Tolerance. *PLoS One.* 2015;10:  
554 e0120695. doi:10.1371/journal.pone.0120695
- 555 38. Waters C, Whalley W, Huxtable C. Grassed up. 2001; 1–50.
- 556 39. De Vitis M, Hay FR, Dickie JB, Trivedi C, Choi J, Fiegenger R. Seed storage: maintaining seed  
557 viability and vigor for restoration use. *Restor Ecol.* 2020;28: 249–255. doi:10.1111/rec.13174
- 558 40. Taylor AG, Prusinski J, Hill HJ, Dickson MD. Influence of Seed Hydration on Seedling  
559 Performance. *Horttechnology.* 1992;2: 336–344. doi:10.21273/HORTTECH.2.3.336
- 560 41. Stevens J, Chivers I, Symons D, Dixon K. Acid-digestion improves native grass seed handling  
561 and germination. *Seed Sci Technol.* 2015;43: 313–317. doi:10.15258/sst.2015.43.2.19
- 562 42. Pedrini S, Bhalsing K, Cross AT, Dixon KW. Protocol Development Tool (PDT) for seed  
563 encrusting and pelleting. *Seed Sci Technol.* 2018;46: 393–405. doi:10.15258/sst.2018.46.2.21
- 564 43. Janda T, Horváth E, Szalai G, Páldi E. Role of salicylic acid in the induction of abiotic stress  
565 tolerance. *Salicylic Acid: A Plant Hormone.* 2007. pp. 91–150. doi:10.1007/1-4020-5184-0\_5
- 566 44. Khan MIR, Fatma M, Per TS, Anjum NA, Khan NA. Salicylic acid-induced abiotic stress  
567 tolerance and underlying mechanisms in plants. *Front Plant Sci.* 2015;6.  
568 doi:10.3389/fpls.2015.00462
- 569 45. BOM. Bureau of Meteorology. West Perth, WA, Australia; 2018. Available:  
570 <http://www.bom.gov.au/wa/>
- 571 46. Ritz C, Baty F, Streibig JC, Gerhard D. Dose-response analysis using R. *PLoS One.* 2015;10: 1–  
572 13. doi:10.1371/journal.pone.0146021
- 573 47. Ritz C, Streibig JC, Ritz, C. & Streibig JC. Bioassay Analysis using R. *J Stat Softw.* 2005;12: 1–22.  
574 doi:10.18637/jss.v012.i05
- 575 48. Bates D, Mächler M, Bolker B, Walker S. Fitting Linear Mixed-Effects Models Using lme4. *J*

- 576 Stat Softw. 2015;67. doi:10.18637/jss.v067.i01
- 577 49. R Core Team. R: A Language and Environment for Statistical Computing. itle. 2015.
- 578 50. Senaratna T, Merritt D, Dixon K, Bunn E, Touchell D, Sivasithamparam K. Benzoic acid may act  
579 as the functional group in salicylic acid and derivatives in the induction of multiple stress  
580 tolerance in plants. *Plant Growth Regul.* 2003;39: 77–81. doi:10.1023/A:1021865029762
- 581 51. Chojnowski M, Corbineau F, Côme D. Physiological and biochemical changes induced in  
582 sunflower seeds by osmopriming and subsequent drying, storage and aging. *Seed Sci Res.*  
583 1997;7. doi:10.1017/S096025850000372X
- 584 52. Kildisheva OA, Dixon KW, Silveira FAO, Chapman T, Di Sacco A, Mondoni A, et al. Dormancy  
585 and germination: making every seed count in restoration. *Restor Ecol.* 2020; rec.13140.  
586 doi:10.1111/rec.13140
- 587 53. Bujalski W, Nienow AW. Large-scale osmotic priming of onion seeds: a comparison of  
588 different strategies for oxygenation. *Sci Hortic (Amsterdam).* 1991;46: 13–24.  
589 doi:10.1016/0304-4238(91)90088-G
- 590 54. Shaw N, Barak RS, Campbell RE, Kirmer A, Pedrini S, Dixon K, et al. Seed use in the field:  
591 delivering seeds for restoration success. *Restor Ecol.* 2020;28: rec.13210.  
592 doi:10.1111/rec.13210
- 593 55. Garretón V, Holuigue L, Salinas P, Blanco F, Garretón V. Salicylic Acid and Reactive Oxygen  
594 Species in the Activation of Stress Defense Genes. *Salicylic Acid: A Plant Hormone.* 2007. pp.  
595 197–246. doi:10.1007/1-4020-5184-0\_8
- 596 56. Larqué-Saavedra A, Martin-Mex R. Effects of Salicylic Acid on the Bioproductivity of Plants.  
597 *Salicylic Acid: A Plant Hormone.* 2007. pp. 15–23. doi:10.1007/1-4020-5184-0\_2
- 598 57. Gutiérrez-Coronado MA, Trejo-López C, Larqué-Saavedra A. Effects of salicylic acid on the  
599 growth of roots and shoots in soybean. *Plant Physiol Biochem.* 1998;36: 563–565.  
600 doi:10.1016/S0981-9428(98)80003-X
- 601 58. Maruri-López I, Aviles-Baltazar NY, Buchala A, Serrano M. Intra and extracellular journey of  
602 the phytohormone salicylic acid. *Front Plant Sci.* 2019;10: 1–11. doi:10.3389/fpls.2019.00423
- 603 59. Paparella S, Araújo SS, Rossi G, Wijayasinghe M, Carbonera D, Balestrazzi A. Seed priming:  
604 state of the art and new perspectives. *Plant Cell Rep.* 2015;34: 1281–1293.  
605 doi:10.1007/s00299-015-1784-y
- 606 60. Hussain S, Zheng M, Khan F, Khaliq A, Fahad S, Peng S, et al. Benefits of rice seed priming are  
607 offset permanently by prolonged storage and the storage conditions. *Sci Rep.* 2015;5: 8101.  
608 doi:10.1038/srep08101
- 609

## 610 Supporting information

611 **S1\_GerminationEmergenceAnalysisResults.pdf**. Final germination and T50 value of germination  
612 experiments of the three test species at full and reduced water potential and emergence in the field  
613 experiment. Statistics obtained with parameter comparison of DRM model comparing treatment, SA,  
614 and combination of treatment and SA against the untreated control.



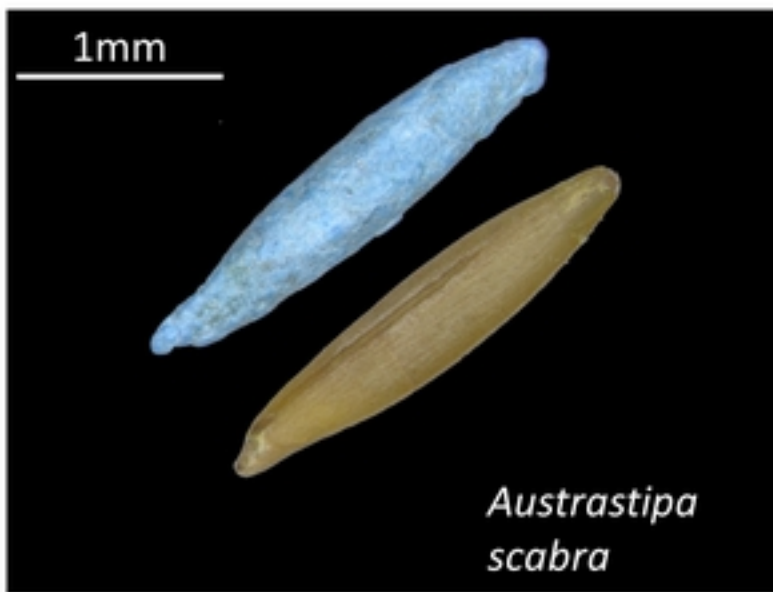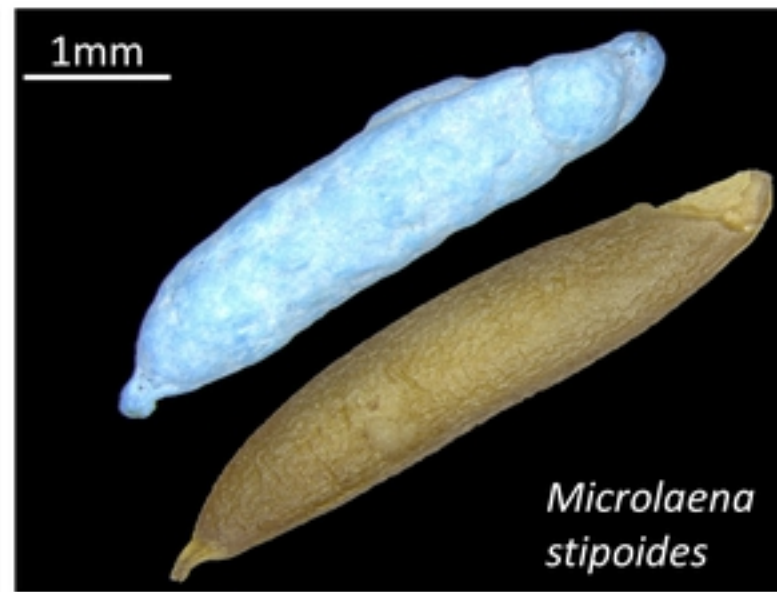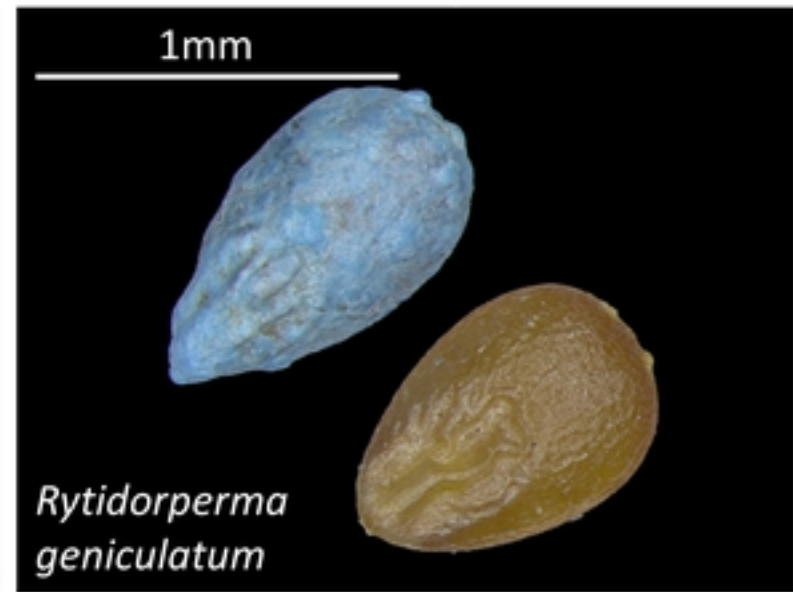

Figure 1

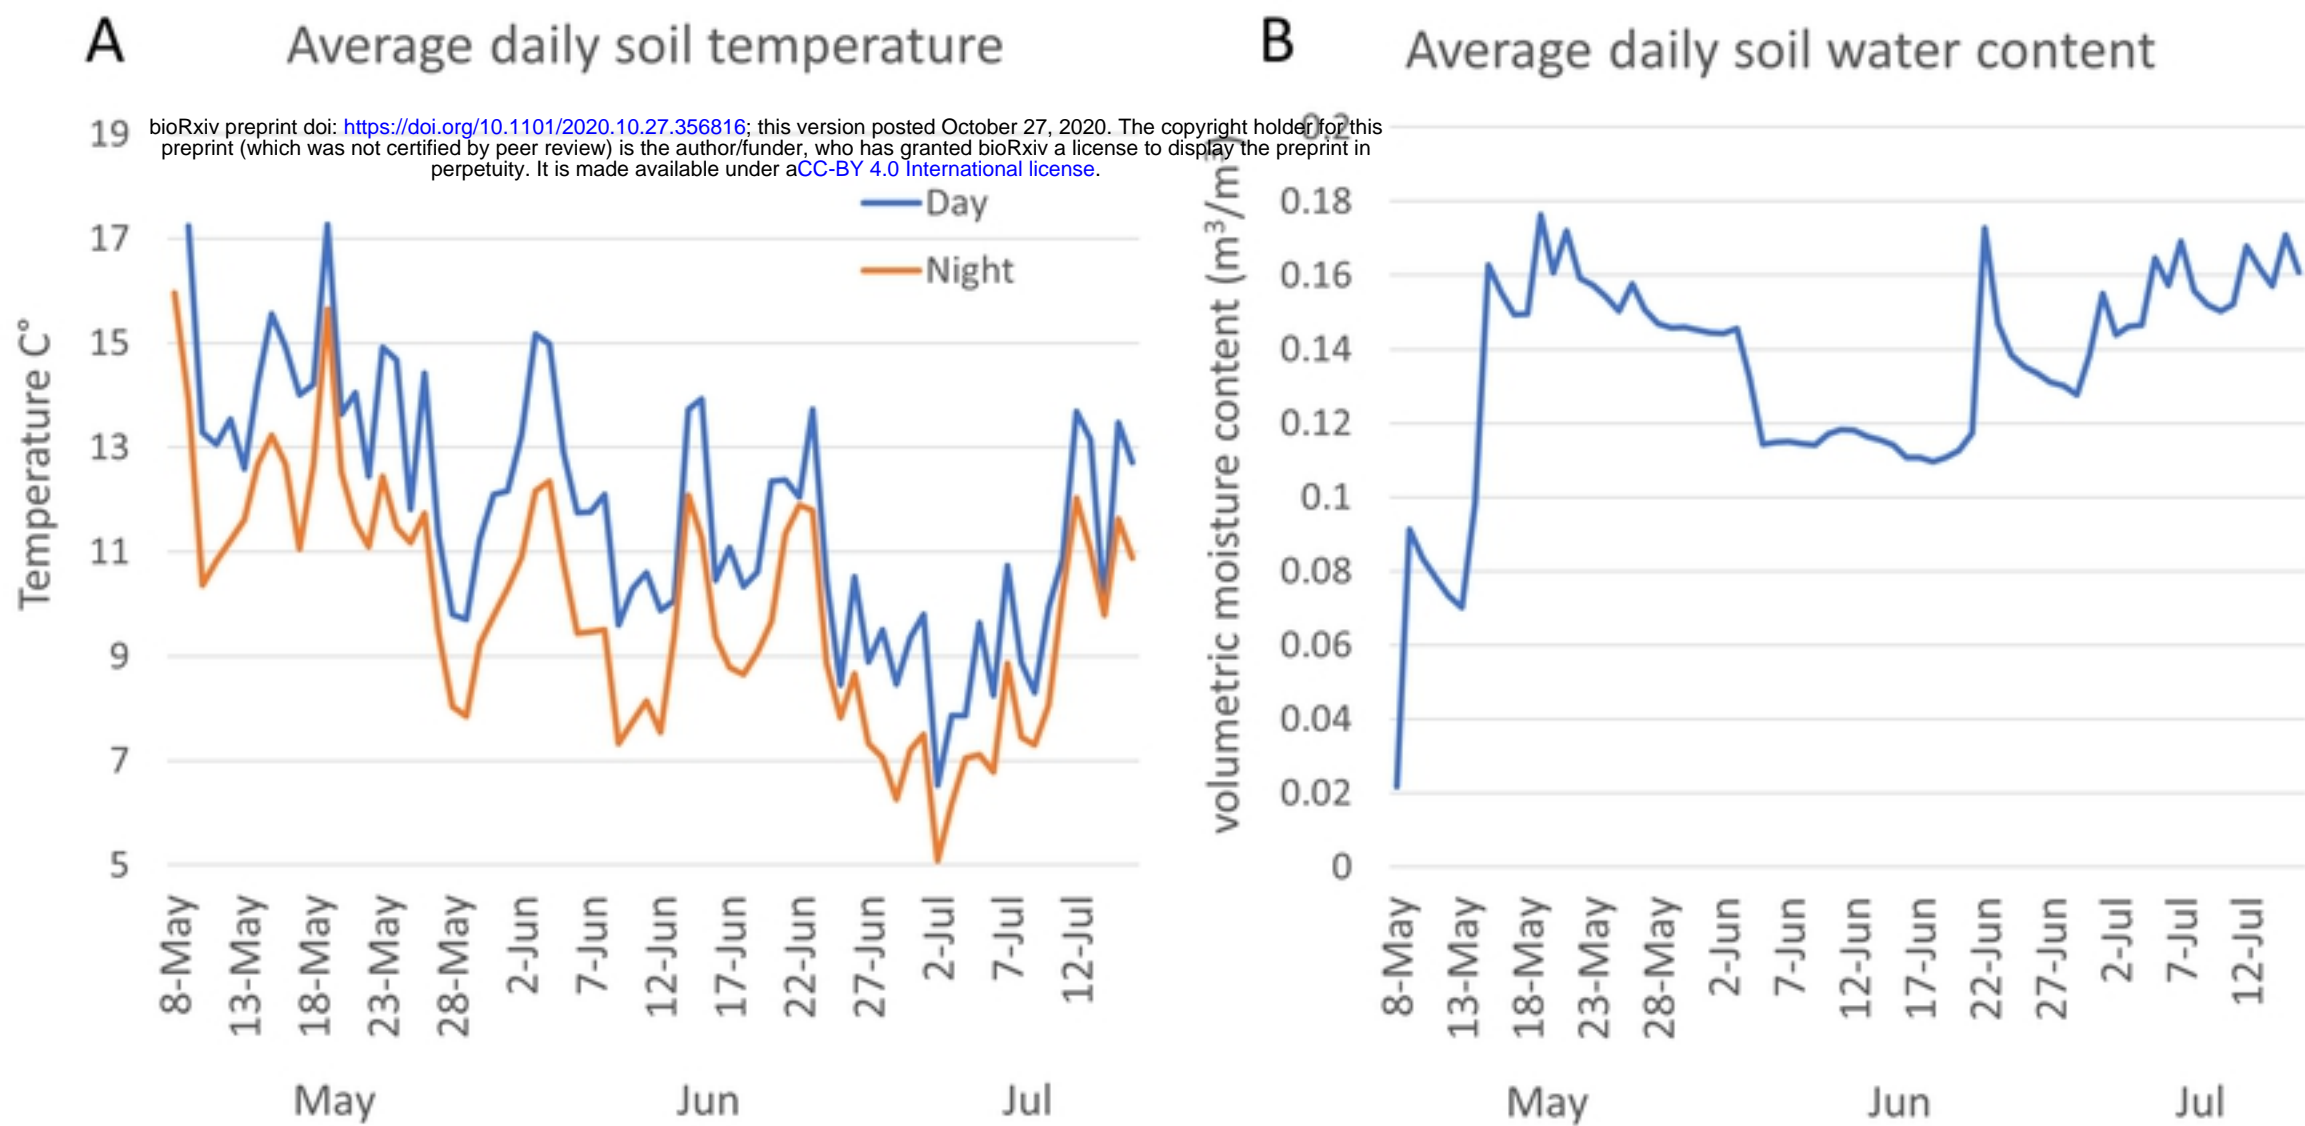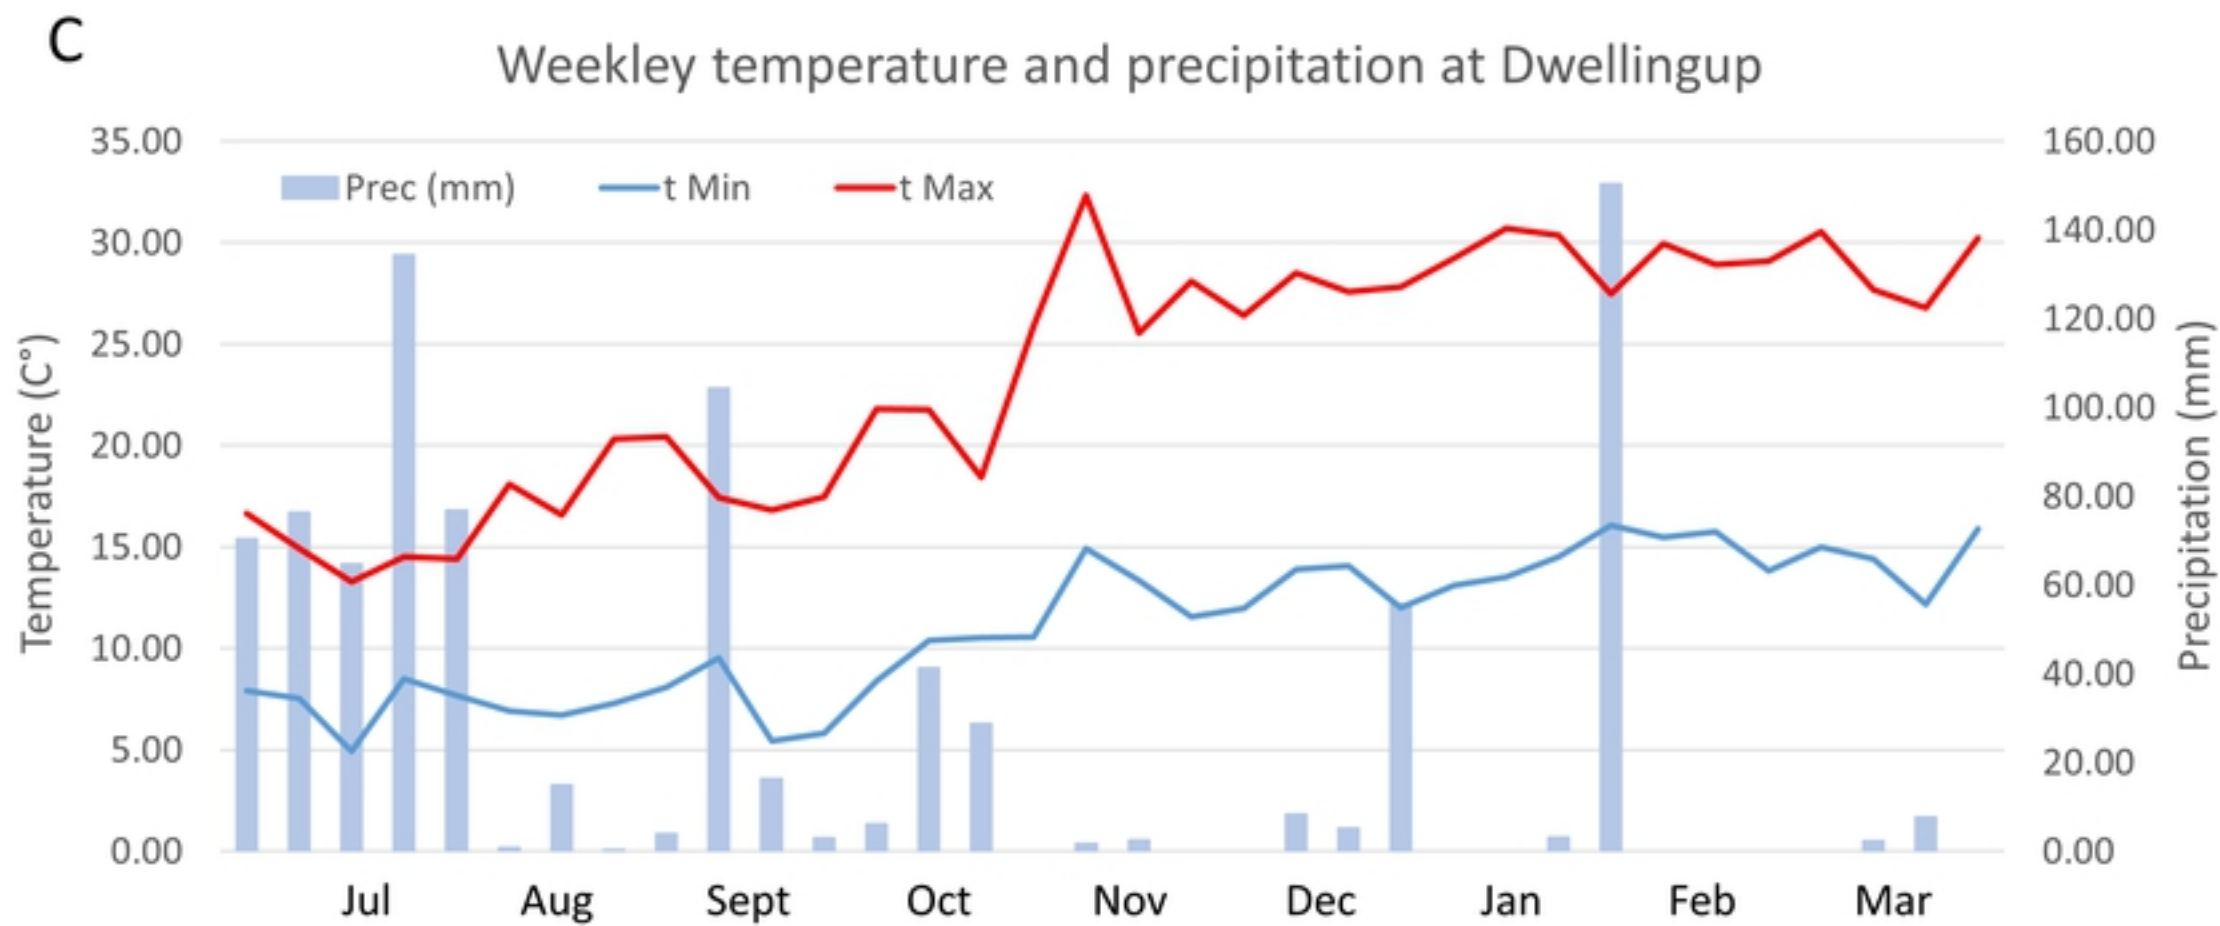

Figure 2

# LAB GERMINATION

# FIELD EMERGENCE

## *Austrostipa scabra*

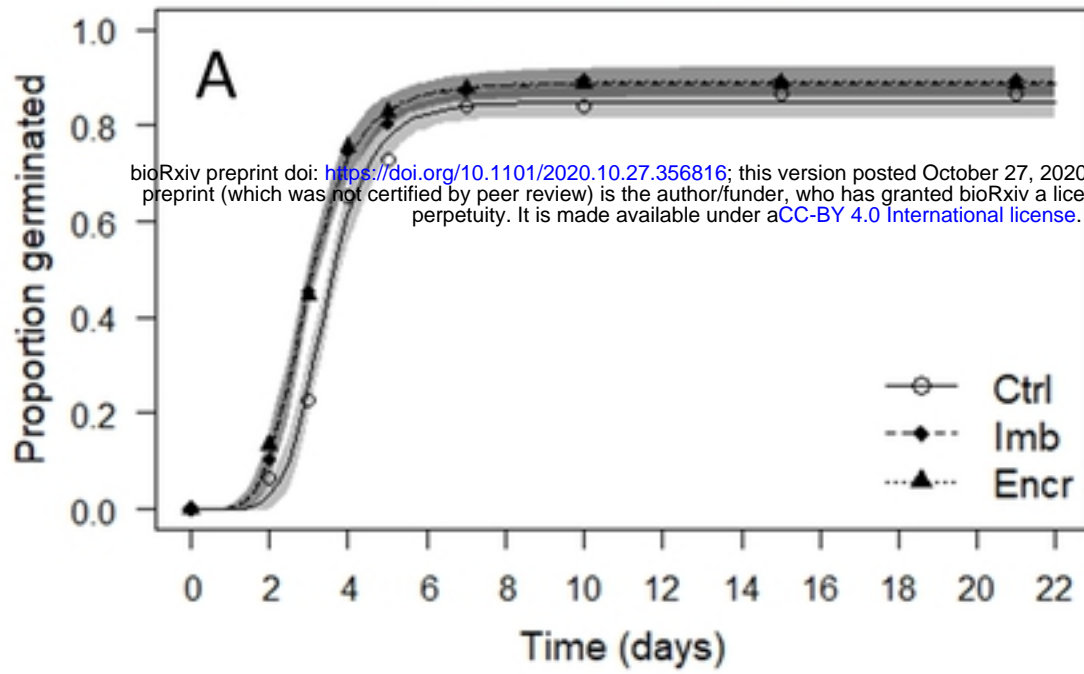

## *Austrostipa scabra*

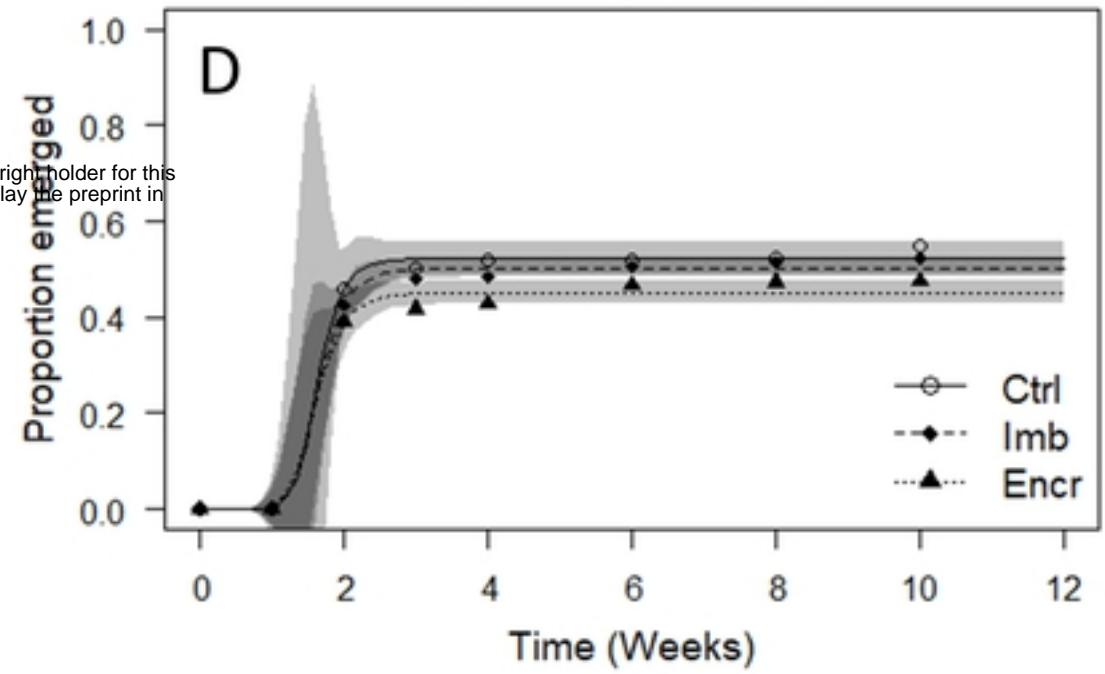

## *Microlaena stipoides*

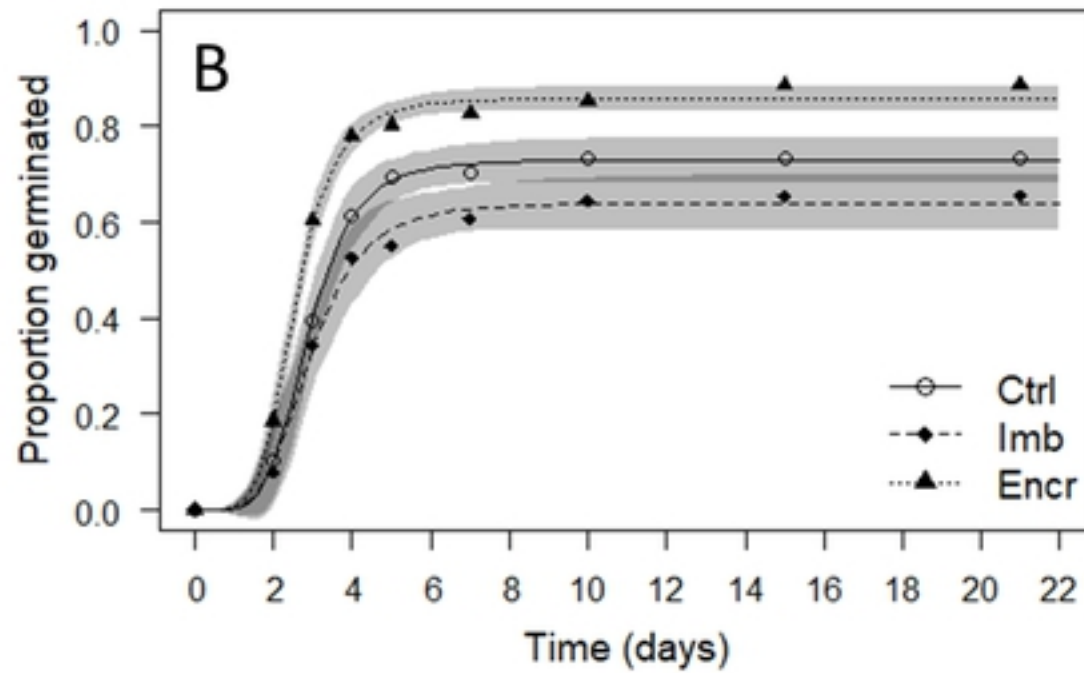

## *Microlaena stipoides*

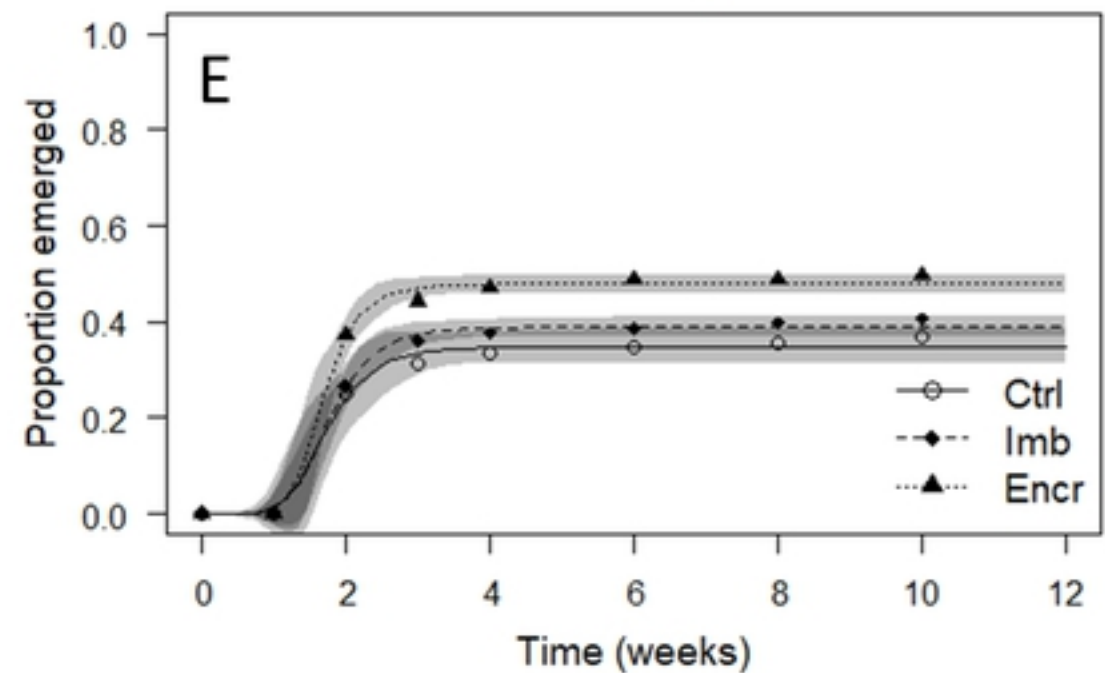

## *Rytidosperma geniculatum*

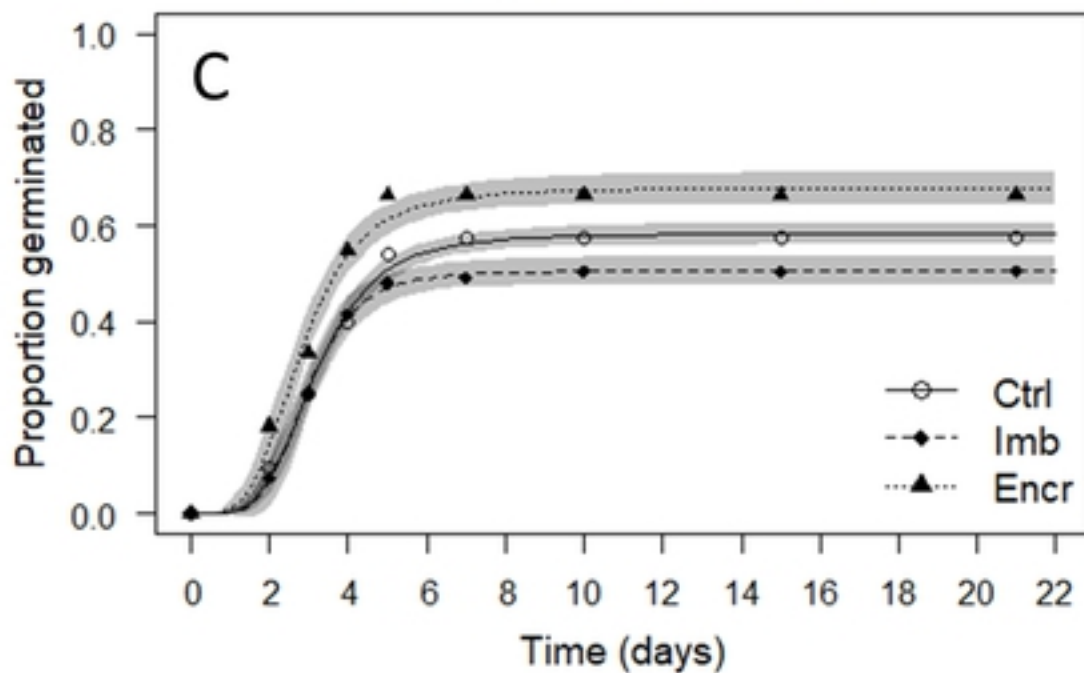

## *Rytidosperma geniculatum*

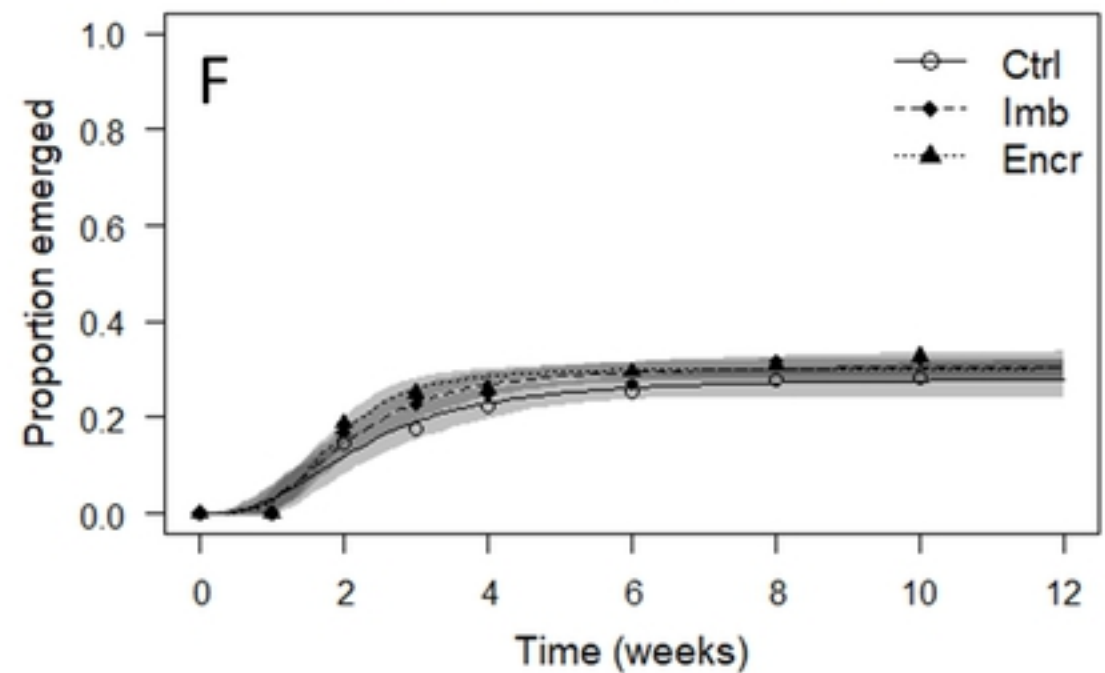

Figure 3

## Lab experiment

## Field experiment

### *Austrastipa scabra*

### Germination in the field (3 weeks)

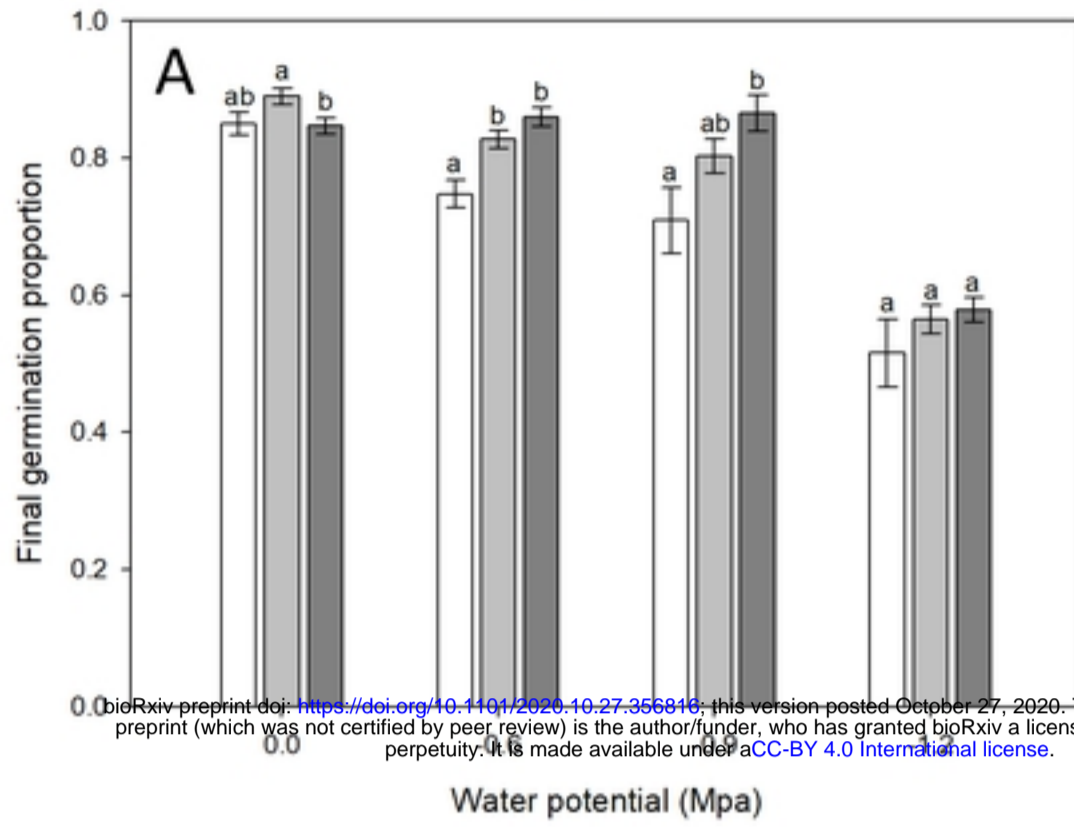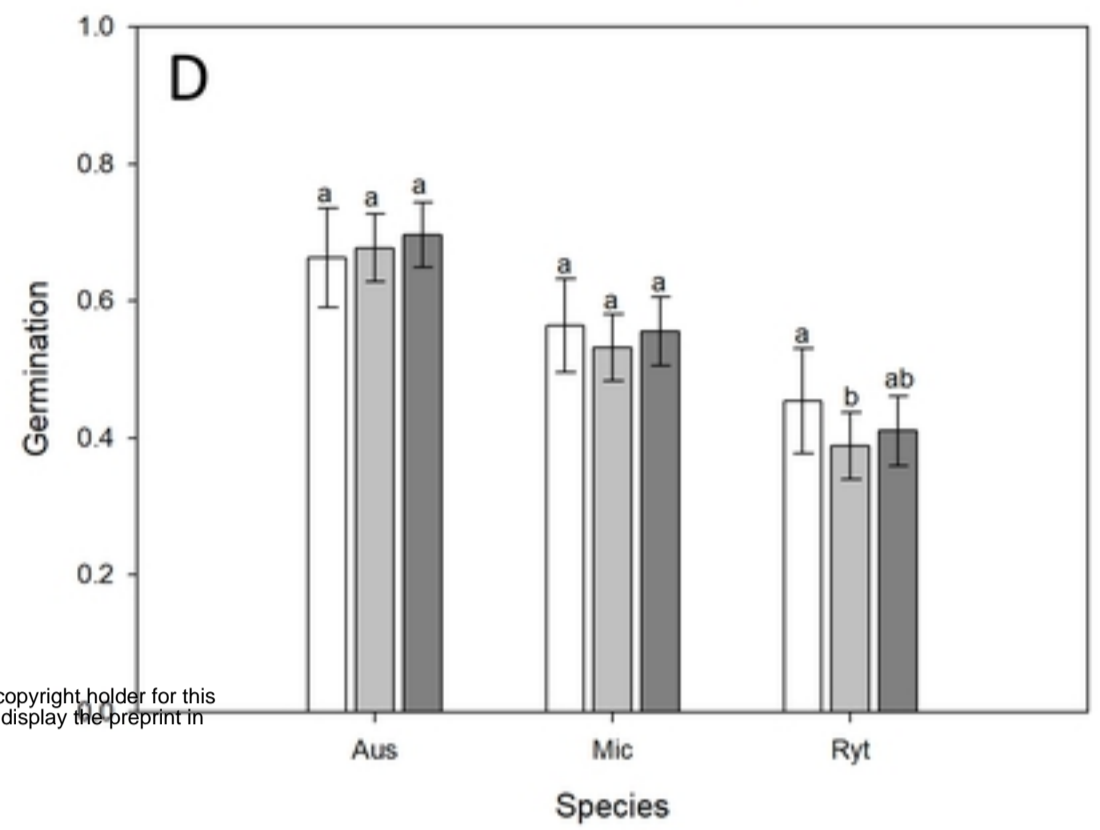

### *Microlaena stipoides*

### Emergence in the field (10 weeks)

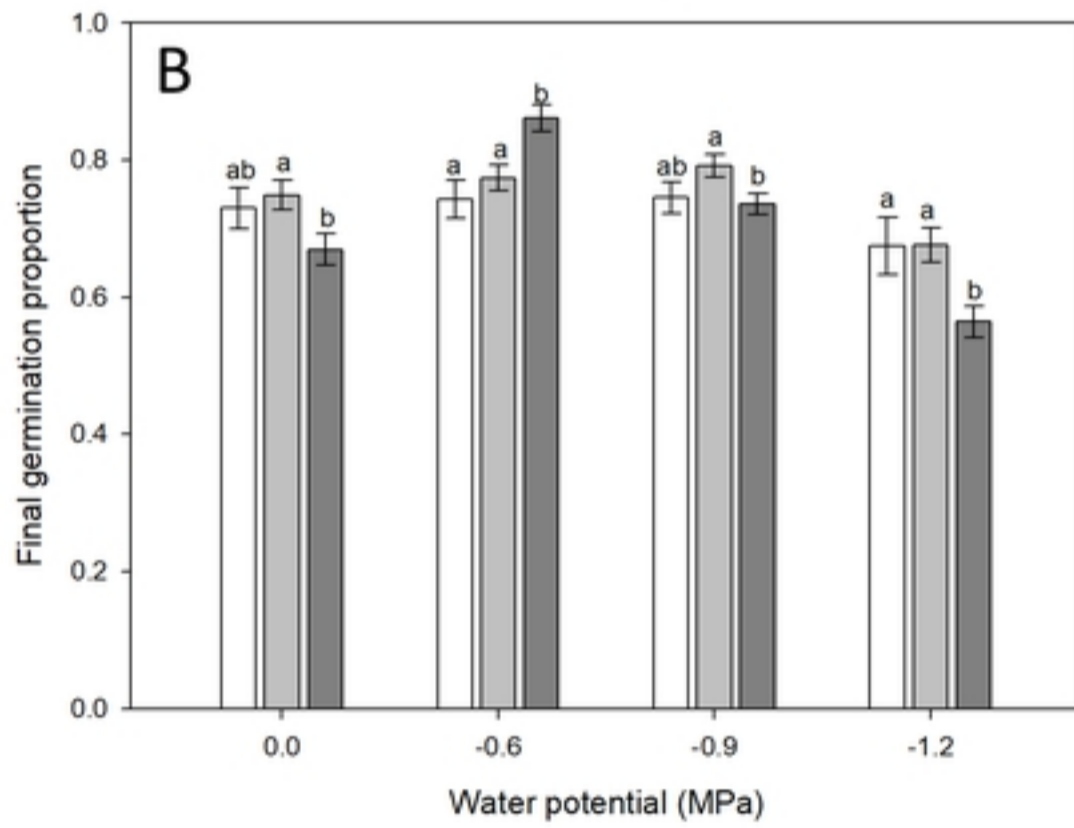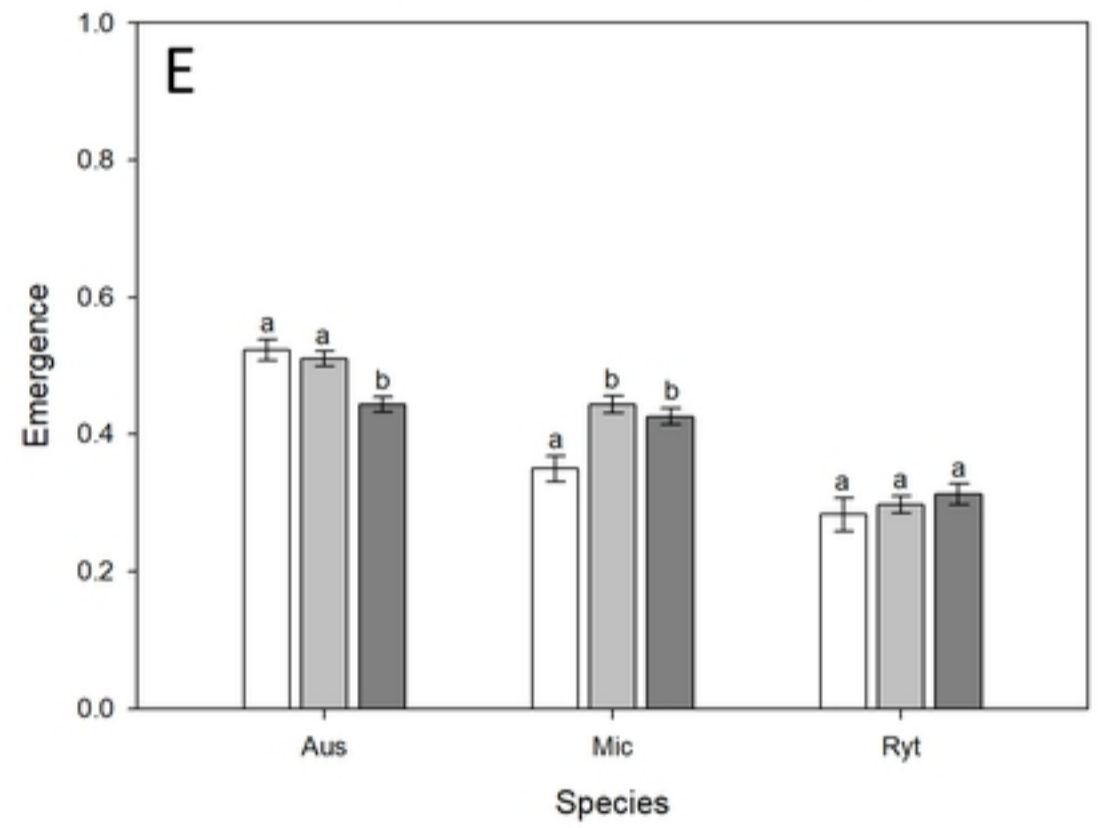

### *Rytidosperma geniculatum*

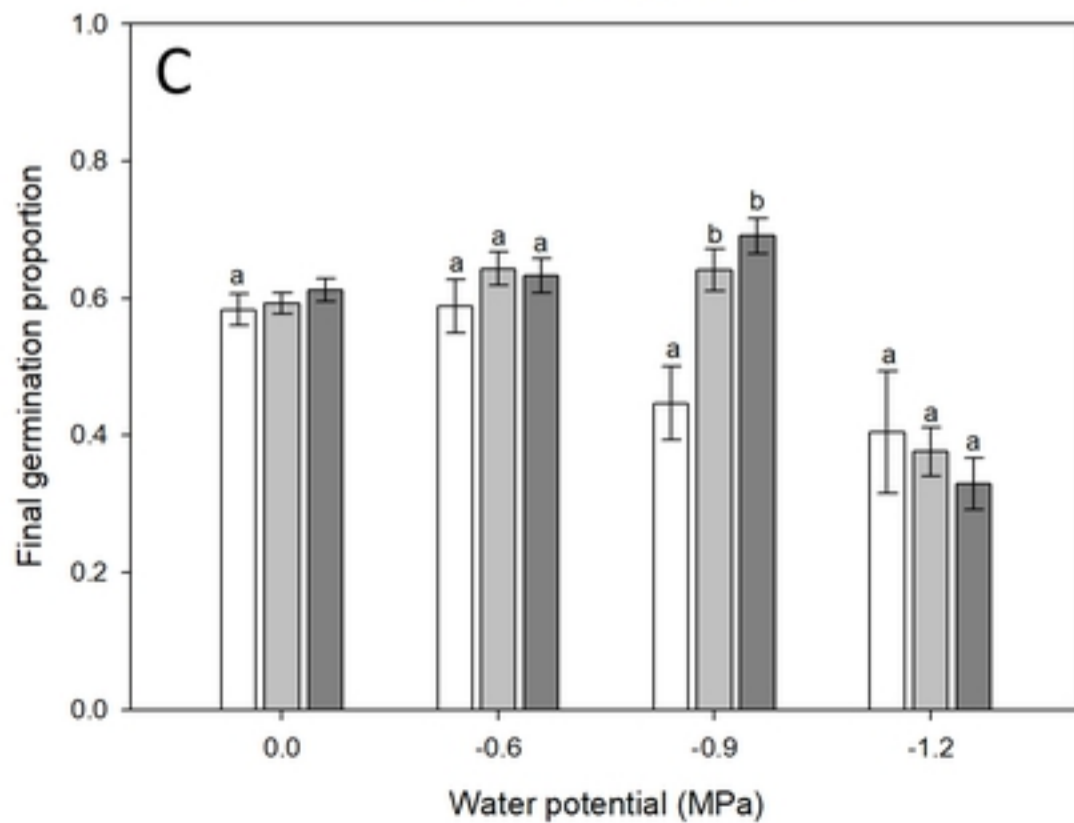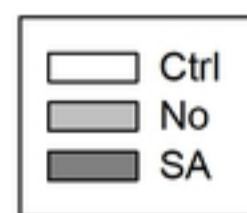

Figure 4

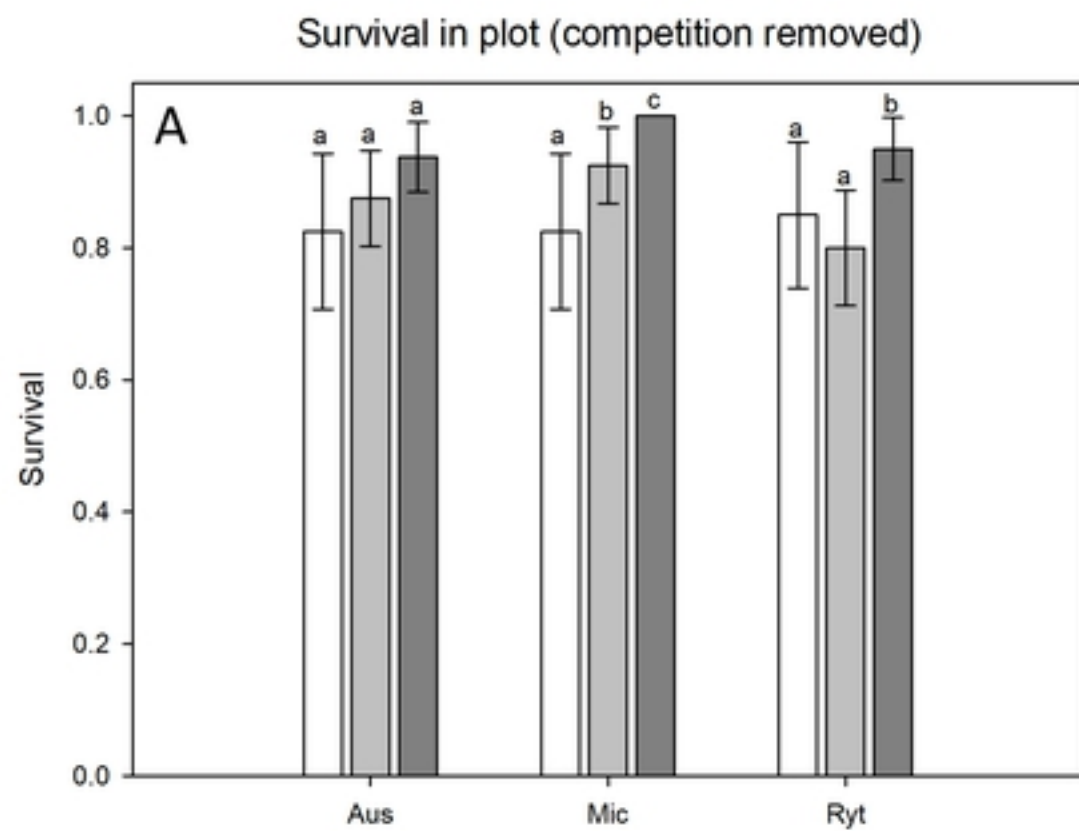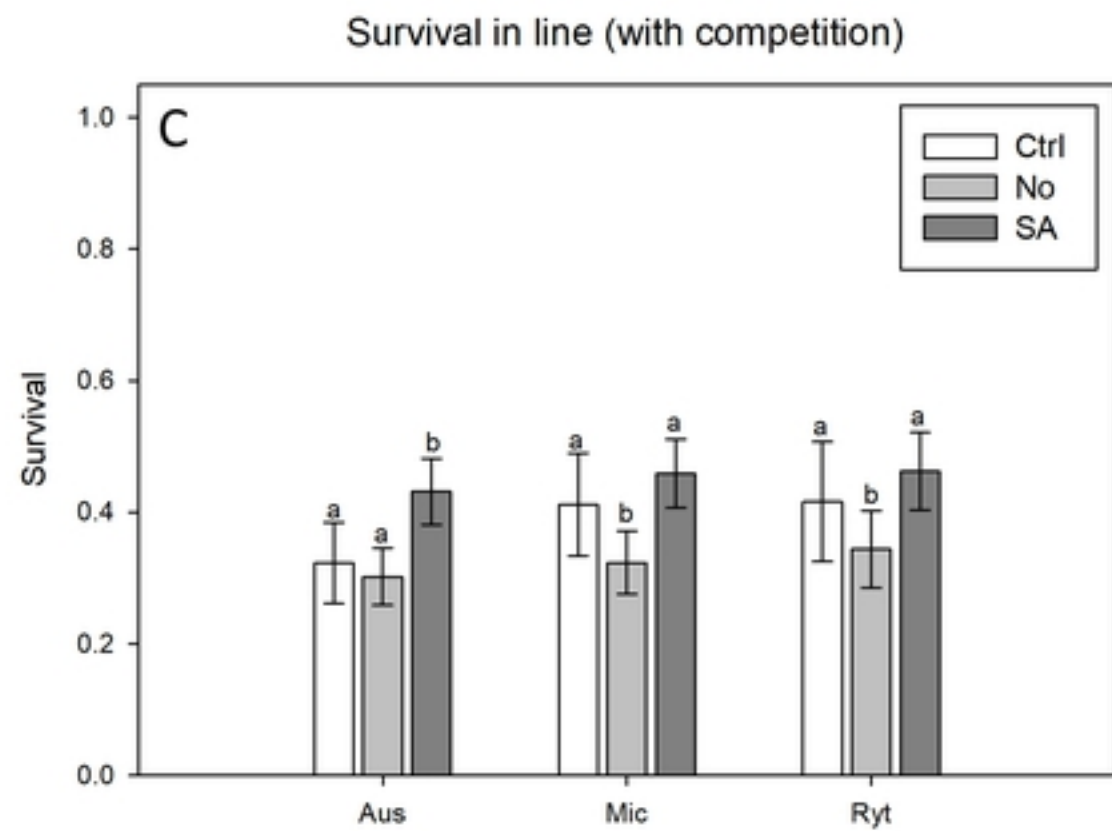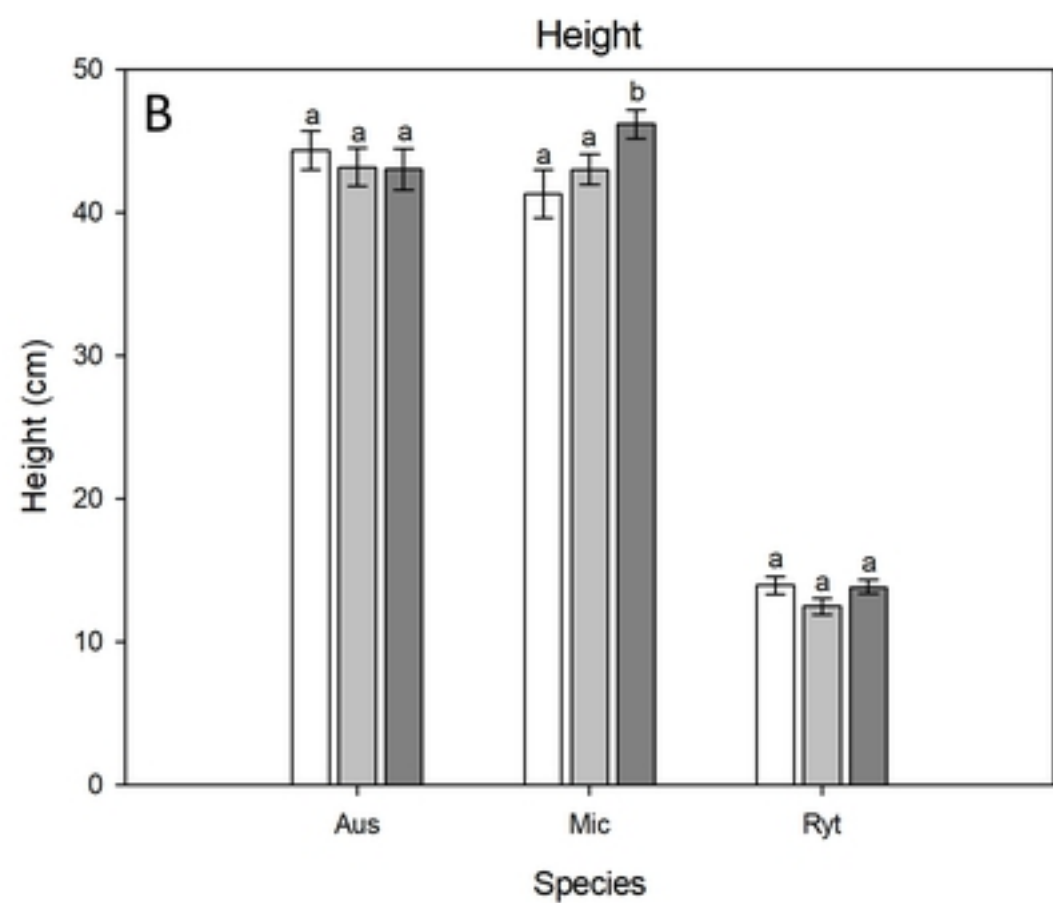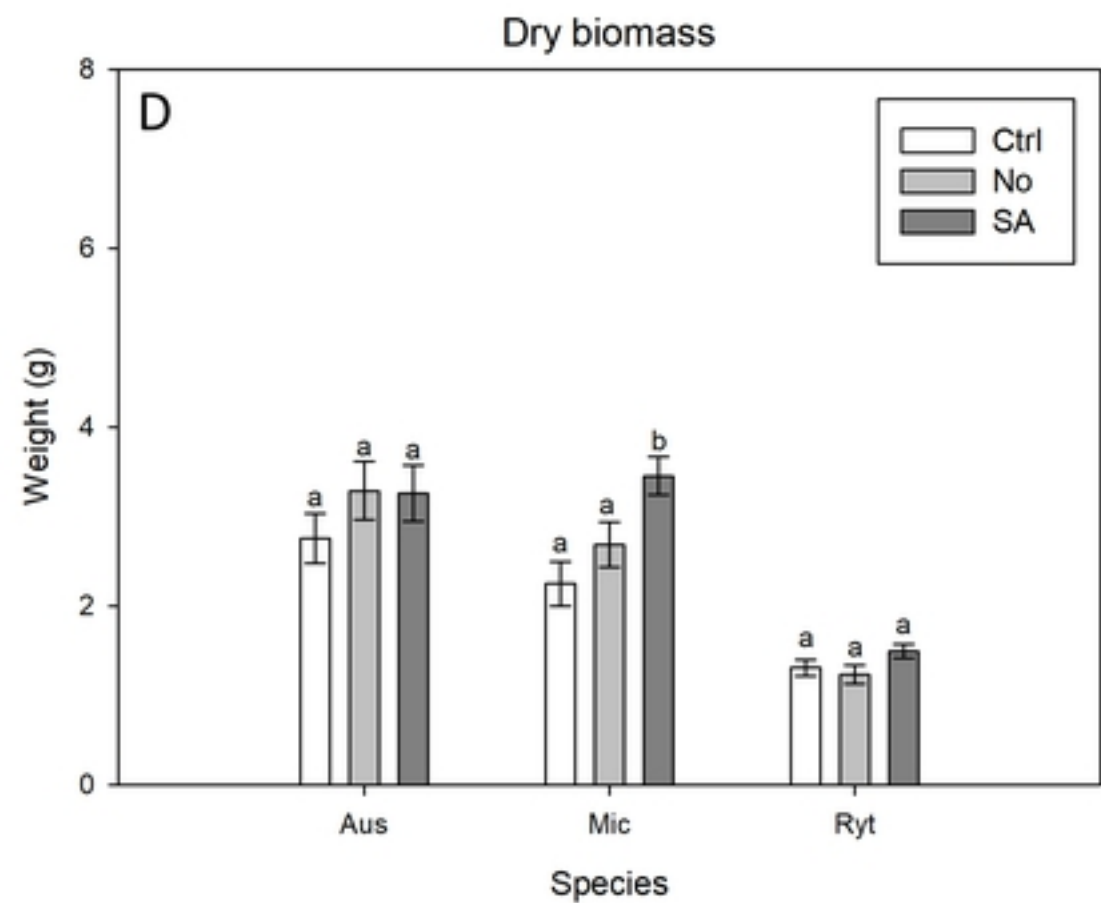

Figure 5

Cumulative survival proportion

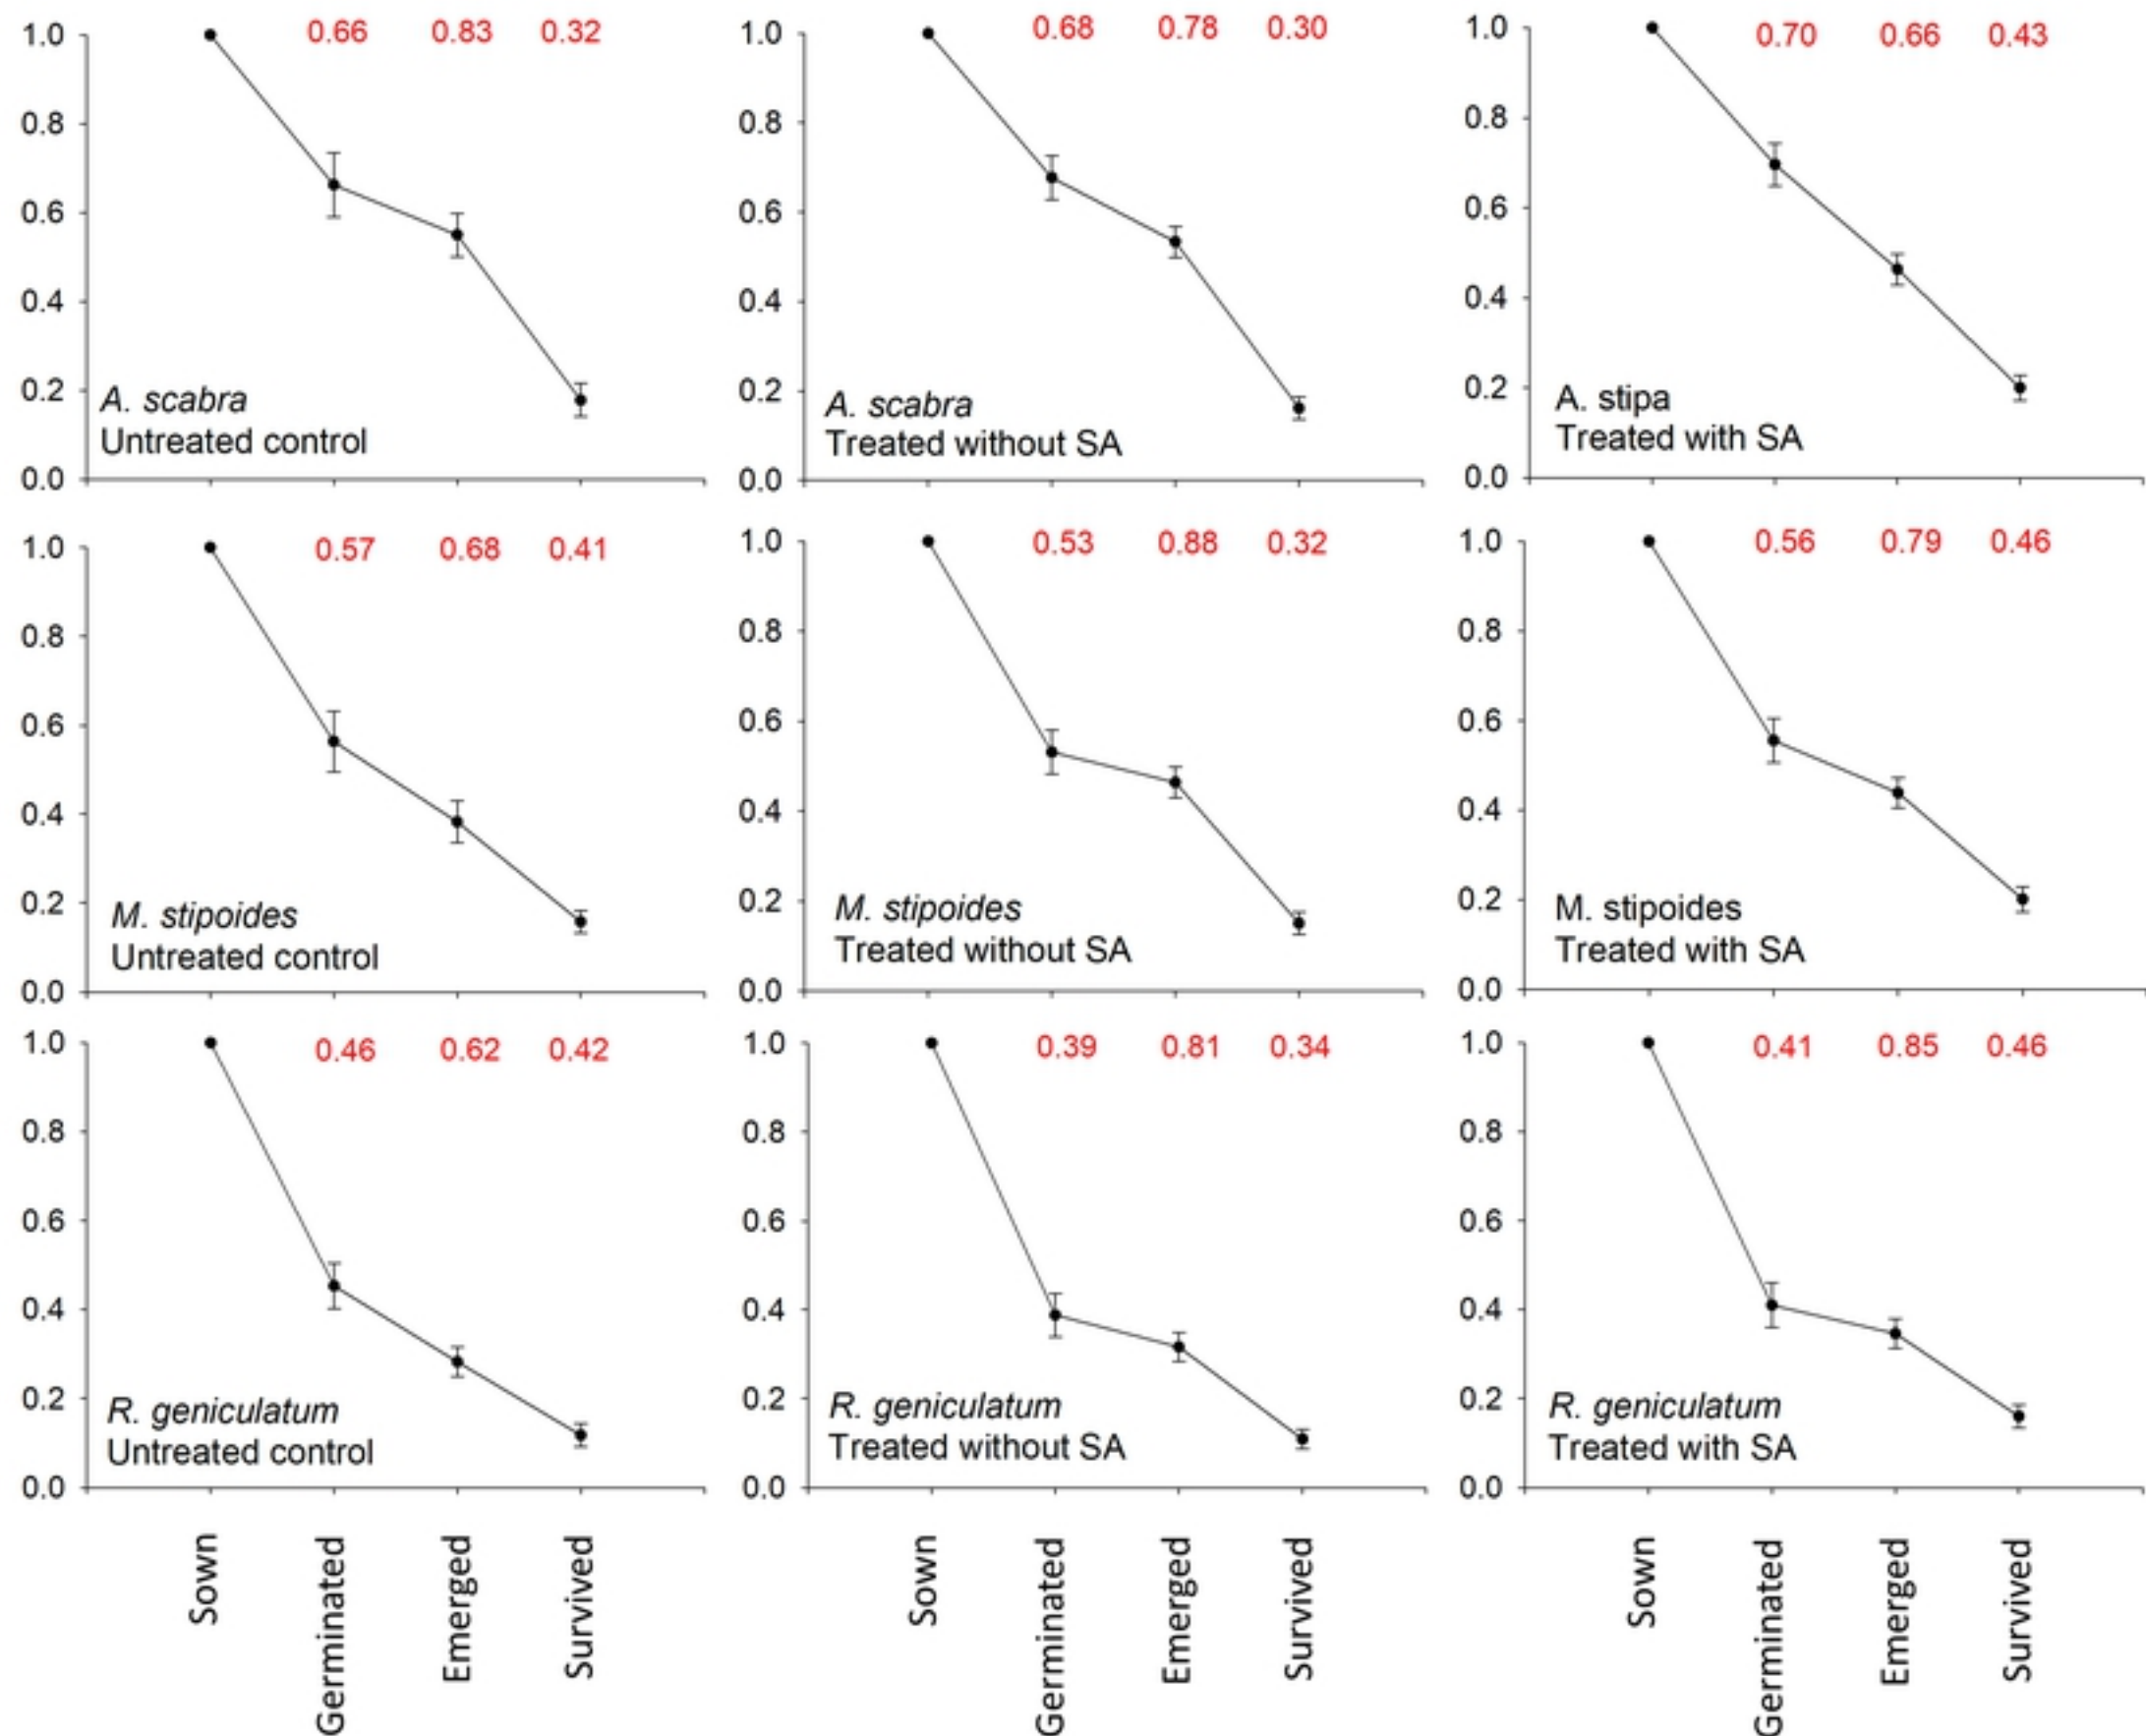

Figure 6
